# Supplementary material for: Integrative Analysis of Serum Lipids and Chronic Gastritis: Causal Insights from Mendelian Randomization and Experimental Models
Source: Research Square preprint supplement (doi:10.21203/rs.3.rs-6909007/v1), 2025-06-23
Supplement: Supplementary file 1 [file 4c9e7ac5bd569dad8b1235da.xlsx]

## Sheet: Supplementary Table 1
Supplementary Table 1. STROBE-MR checklist of recommended items to address in reports of Mendelian randomisation studies
Item No.	Section	Checklist item	Page No.
1	TITLE and ABSTRACT	Indicate Mendelian randomisation as the study’s design in the title and/or the abstract if that is a main purpose of the study	1
	INTRODUCTION
2	Background	Explain the scientific background and rationale for the reported study. What is the exposure? Is a potential causal relationship between exposure and outcome plausible? Justify why MR is a helpful method to address the study question	4
3	Objectives	State specific objectives clearly, including pre-specified causal hypotheses (if any). State that MR is a method that, under specific assumptions, intends to estimate causal effects	6
	METHODS
4	Study design and data sources	Present key elements of the study design early in the article. Consider including a table listing sources of data for all phases of the study. For each data source contributing to the analysis, describe the following:	7
	a)	Setting: Describe the study design and the underlying population, if possible. Describe the setting, locations, and relevant dates, including periods of recruitment, exposure, follow-up, and data collection, when available.	7
	b)	Participants: Give the eligibility criteria, and the sources and methods of selection of participants. Report the sample size, and whether any power or sample size calculations were carried out prior to the main analysis	7
	c)	Describe measurement, quality control and selection of genetic variants	11
	d)	For each exposure, outcome, and other relevant variables, describe methods of assessment and diagnostic criteria for diseases	9
	e)	Provide details of ethics committee approval and participant informed consent, if relevant	7
5	Assumptions	Explicitly state the three core IV assumptions for the main analysis (relevance, independence and exclusion restriction) as well assumptions for any additional or sensitivity analysis	6
6	Statistical methods: main analysis	Describe statistical methods and statistics used	4-5
	a)	Describe how quantitative variables were handled in the analyses (i.e., scale, units, model)	4
	b)	Describe how genetic variants were handled in the analyses and, if applicable, how their weights were selected	4
	c)	Describe the MR estimator (e.g. two-stage least squares, Wald ratio) and related statistics. Detail the included covariates and, in case of two-sample MR, whether the same covariate set was used for adjustment in the two samples	4
	d)	Explain how missing data were addressed	5
	e)	If applicable, indicate how multiple testing was addressed	4
7	Assessment of assumptions	Describe any methods or prior knowledge used to assess the assumptions or justify their validity	10-11
8	Sensitivity analyses and additional analyses	Describe any sensitivity analyses or additional analyses performed (e.g. comparison of effect estimates from different approaches, independent replication, bias analytic techniques, validation of instruments, simulations)	11-12
9	Software and pre-registration
	a)	Name statistical software and package(s), including version and settings used	12
	b)	State whether the study protocol and details were pre-registered (as well as when and where)	N/A
	RESULTS
10	Descriptive data
	a)	Report the numbers of individuals at each stage of included studies and reasons for exclusion. Consider use of a flow-diagram	Fig 1
	b)	Report summary statistics for phenotypic exposure(s), outcome(s) and other relevant variables (e.g. means, SDs, proportions)	Supplementary Table 4-19
	c)	If the data sources include meta-analyses of previous studies, provide the assessments of heterogeneity across these studies	N/A
	d)	For two-sample Mendelian randomisation:
		i. Provide justification of the similarity of the genetic variant-exposure associations between the exposure and outcome samples	N/A
		ii. Provide information on the number of individuals who were in both samples for the exposure and for the outcome	N/A
11	Main results
	a)	Report the associations between genetic variant and exposure, and between genetic variant and outcome, preferably on an interpretable scale	12-14
	b)	Report MR estimates of the relationship between exposure and outcome, and the measures of uncertainty from the MR analysis, on an interpretable scale, such as odds ratio or relative risk per SD difference	12-14
	c)	If relevant, consider translating estimates of relative risk into absolute risk for a meaningful time period	N/A
	d)	Consider plots to visualize results (e.g. forest plot, scatterplot of associations between genetic variants and outcome versus between genetic variants and exposure)	Figures 2-3
12	Assessment of assumptions
	a)	Report the assessment of the validity of the assumptions	6
	b)	Report any additional statistics (e.g., assessments of heterogeneity across genetic variants, such as I2, Q statistic or E-value)	Supplementary Table 20-23,27-28
13	Sensitivity analyses and additional analyses
	a)	Report any sensitivity analyses to assess the robustness of the main results to violations of the assumptions	12
	b)	Report results from other sensitivity analyses or additional analyses	12
	c)	Report any assessment of direction of causal relationship (e.g., bidirectional MR)	N/A
	d)	When relevant, report and compare with estimates from non-MR analyses	N/A
	e)	Consider additional plots to visualize results (e.g., leave-one-out analyses)	N/A
	DISCUSSION
14	Key results	Summarize key results with reference to study objectives	17
15	Limitations	Discuss limitations of the study, taking into account the validity of the IV assumptions, other sources of potential bias, and imprecision. Discuss both direction and magnitude of any potential bias and any efforts to address them	25-26
16	Interpretation
	a)	Meaning: Give a cautious overall interpretation of results in the context of their limitations and in comparison with other studies	17-25
	b)	Mechanism: Discuss underlying biological mechanisms that could drive a potential causal relationship between the investigated exposure and the outcome, and whether the gene-environment equivalence assumption is reasonable. Use causal language carefully, clarifying that IV estimates may provide causal effects only under certain assumptions	17-25
	c)	Clinical relevance: Discuss whether the results have clinical or public policy relevance, and to what extent they inform effect sizes of possible interventions	17-25
17	Generalizability	Discuss the generalizability of the study results (a) to other populations, (b) across other exposure periods/timings, and (c) across other levels of exposure	25
	OTHER INFORMATION
18	Funding	Describe sources of funding and the role of funders in the present study and, if applicable, sources of funding for the databases and original study or studies on which the present study is based	27
19	Data and data sharing	Provide the data used to perform all analyses or report where and how the data can be accessed, and reference these sources in the article. Provide the statistical code needed to reproduce the results in the article,or report whether the code is publicly accessible and if so, where	28
20	Conflicts of Interest	All authors should declare all potential conflicts of interest	28

## Sheet: Supplementary Table 2
Supplementary Table 2. Phenotype descriptions and distributions
Phenotypes	Study / Consortium	Sample Size	N Cases	N Controls	Population	GWAS ID (MRC-IEU)	Unit	Data availability
Lipids traits
Low Density Lipoprotein Cholesterol	Global Lipids Genetics Consortium (GLGC)	1320016			European	NA	mg/dl	GWAS Catalog (ebi.ac.uk)
Triglycerides		1320016			European	NA	mg/dl	GWAS Catalog (ebi.ac.uk)
High Density Lipoprotein Cholesterol		1320016			European	NA	mg/dl	GWAS Catalog (ebi.ac.uk)
Total Cholesterol		1320016			European	NA	mg/dl	GWAS Catalog (ebi.ac.uk)
Apolipoprotein A1	Richardson et al.	393193			European	ieu-b-107	mmol/L	Trait: apolipoprotein A-I - IEU OpenGWAS project (mrcieu.ac.uk)
Apolipoprotein B		439214			European	ieu-b-108	mmol/L	Trait: Apolipoprotein B - IEU OpenGWAS project (mrcieu.ac.uk)
Remnant cholesterol		115078			European	met-d-Remnant_C	mmol/L	Trait: Remnant cholesterol - IEU OpenGWAS project (mrcieu.ac.uk)
Lipoprotein A		329317			European	ukb-d-30790_raw	mmol/L	Trait: Lipoprotein A - IEU OpenGWAS project (mrcieu.ac.uk)
lipid metabolic traits	Richardson et al.	121584			European	NA	-	GWAS Catalog (ebi.ac.uk)
Outcome
Chronic gastritis	Kurki MI, et al.	79429	7495	71934	European	finn-b-K11_CHRONGASTR		Phenotype | Cerebrovascular Disease Knowledge Portal (hugeamp.org)
Chronic gastritis	Allen NE, et al.	463010	1467	461543	European	UKB-B-6716		Phenotype | Cerebrovascular Disease Knowledge Portal (hugeamp.org)
Positive control
Coronary artery disease	UKBiobank	463009	12170	450839	European	ukb-b-1668		https://gwas.mrcieu.ac.uk/
Coronary artery disease	FinnGen consortium	56685	378019	434704	European	finn-b-I9_CORATHER		https://gwas.mrcieu.ac.uk/
eQTL
GTExV8	Gtex Consotrium	948			White (84.6%) African American ancestry. (12.9%) Asian ancestry. (1.3%)		SD	https://console.cloud.google.com/storage/browser/gtex-resources
eQTLgen	eQTLGen Consortium	31,684			European		SD	https://eqtlgen.org/

## Sheet: Supplementary Table 3
Supplementary Table 3: Lipid-lowering drug classes, substances, and target genes.
Primary pharmacological action	Gene	Chromosome	Base pair(GRCh37)	Drug target	Mechanism of action	SNP	Substance
Reduced LDL-C	HMGCR	5	74632993-74657941	HMG-CoA reductase	HMGCR inhibition	5	Statins
	PCSK9	1	55505221-55530525	Proprotein convertase subtilisin/kexin type 9	PCSK9 inhibition	11	Evolocumab, alirocumab
	ABCG5/ABCG8	2	44039611-44065978, 44066110-44110127	ATP Binding Cassette Subfamily G Member 5/ATP Binding Cassette Subfamily G Member 8	ABCG5/ABCG8 enhancement	7	Colesevelam ,Colestipol ,Cholestyramine
	APOB	2	21224301-21266945	Apolipoprotein B-100	APOB inhibition	15	Mipomersen
	LDLR	19	11200139 -11244496	LDL receptor	LDLR inhibition	12	-
Reduced TC	LPL	8	19796764-19824770	Lipoprotein lipase	LPL activation	15	Ibrolipim
	ANGPTL3	1	63063191-63071984	Angiopoietin Like 3	ANGPTL3 inhibition	3	Evinacumab
	APOC3	8	19796764-19824770	Apolipoprotein C3	APOC3 inhibition	12	Volanesorsen
Increased HDL-C	CETP	16	56995862-57017757	Cholesteryl ester transfer protein	CETP inhibition	34	Torcetrapib, dalcetrapib, evacetrapib, and anacetrapib

## Sheet: Supplementary Table 4
Supplementary Table 4 . Genetic variants that were used as instruments for low-density lipoprotein cholesterol in Finn
SNP	Effect Allele	other allele	Beta	SE	P value	Effect Allele Frequency	F
rs2298214	C	A	-0.01241	0.00194099	1.6e-10	0.577365	40.8787
rs649915	G	A	-0.0236817	0.00378426	3.89996e-10	0.067888	39.1619
rs116524683	G	A	0.0155865	0.00272569	1.09999e-08	0.858371	32.6997
rs12746810	G	A	-0.0810512	0.00636562	3.90032e-37	0.023124	162.12
rs561568918	C	T	-0.0390545	0.00347898	2.99985e-29	0.081325	126.02
rs140476492	G	A	-0.0391338	0.00347974	2.39994e-29	0.081326	126.477
rs7545741	C	T	-0.0396939	0.00349612	7.10068e-30	0.080514	128.907
rs113287499	G	A	-0.0390876	0.00349695	5.19996e-29	0.080529	124.939
rs45596631	C	A	0.0247686	0.00250933	5.60015e-23	0.806358	97.4288
rs1187948	T	C	-0.0385629	0.00351469	5.19996e-28	0.079546	120.383
rs7541717	A	G	-0.0110251	0.00200967	4.09996e-08	0.337684	30.0965
rs79029362	T	G	-0.0179072	0.00190707	6.00067e-21	0.533101	88.1703
rs6684959	C	T	0.0168151	0.00193741	4.00037e-18	0.411262	75.3279
rs78030888	C	G	0.0124552	0.00191594	8.00018e-11	0.534727	42.2608
rs111491640	C	A	-0.0115703	0.00197461	4.60002e-09	0.37001	34.3342
rs67788756	C	T	-0.0246494	0.00204396	1.69981e-33	0.318148	145.435
rs75216965	T	A	-0.0257183	0.00202534	6.00067e-37	0.328694	161.246
rs2452903	G	A	-0.0256001	0.00202475	1.20005e-36	0.328843	159.86
rs111567021	T	A	-0.0227455	0.001981	1.59993e-30	0.3595	131.832
rs20562	C	A	-0.0106144	0.00191671	3.09999e-08	0.430009	30.6675
rs143494487	A	G	0.0106138	0.00191673	3.09999e-08	0.569991	30.6634
rs78591588	T	A	0.0105995	0.0019284	3.89996e-08	0.416552	30.2118
rs140584697	T	G	-0.0141903	0.00193233	2.09991e-13	0.589773	53.9288
rs74971325	T	C	-0.0148213	0.00191599	1e-14	0.564083	59.8392
rs115945763	G	A	-0.0144628	0.00255581	1.5e-08	0.168679	32.0219
rs143658239	A	G	0.0129082	0.00200046	1.09999e-10	0.343757	41.6363
rs60326124	G	A	0.0276562	0.00207854	2.09991e-40	0.702698	177.039
rs59234976	T	C	0.0244942	0.00204744	5.50047e-33	0.685451	143.121
rs72470595	T	C	0.0240027	0.00204068	6.09958e-32	0.682364	138.347
rs72470598	A	C	0.0168013	0.00202404	1e-16	0.338948	68.9045
rs114012769	A	T	0.017517	0.00214168	2.90001e-16	0.270963	66.8976
rs137863666	C	T	0.0181197	0.00247467	2.39994e-13	0.816933	53.6127
rs115762034	G	A	0.0109437	0.00190935	9.90011e-09	0.495081	32.8517
rs3789126	G	A	-0.0117141	0.00208231	1.79999e-08	0.3012	31.6466
rs60286362	G	C	-0.0245707	0.00389756	2.90001e-10	0.0635	39.742
rs778106	G	A	0.0115764	0.00195967	3.50002e-09	0.615432	34.8964
rs114892556	A	G	-0.014443	0.00247997	5.80003e-09	0.820883	33.9174
rs72932409	T	G	0.0138213	0.0022041	3.59998e-10	0.247521	39.322
rs111973496	A	G	0.0123164	0.00191647	1.29999e-10	0.446048	41.3013
rs13415932	A	C	0.0131939	0.00197851	2.60016e-11	0.365039	44.4703
rs76772145	A	T	-0.0189073	0.00204367	2.19989e-20	0.315582	85.5929
rs150357933	T	G	0.0138368	0.00196258	1.80011e-12	0.403795	49.7069
rs13032993	T	C	-0.0783702	0.00490443	1.80011e-57	0.050415	255.344
rs61733623	A	G	-0.0968681	0.0136949	1.50003e-12	0.005078	50.0315
rs187153158	T	C	-0.0135803	0.00192691	1.80011e-12	0.558801	49.6702
rs76082446	G	A	-0.0153581	0.00195629	4.10015e-15	0.546852	61.6323
rs138217869	A	G	0.0112872	0.00193418	5.39995e-09	0.581762	34.0548
rs4241399	T	C	-0.0117938	0.00195024	1.5e-09	0.550839	36.5705
rs72626372	A	G	-0.0122221	0.00222351	3.89996e-08	0.241559	30.2144
rs79300291	A	C	-0.0157929	0.00239422	4.19952e-11	0.197806	43.5107
rs114058810	C	T	-0.0158394	0.00239381	3.69999e-11	0.197935	43.7823
rs62264119	A	G	-0.0157962	0.00237313	2.80027e-11	0.202401	44.306
rs34980487	C	T	-0.0139134	0.00233601	2.59998e-09	0.212259	35.4746
rs28886962	T	C	-0.0108705	0.00197487	3.69999e-08	0.368579	30.2986
rs1022186	C	T	0.0255176	0.00257969	4.49987e-23	0.833311	97.8463
rs35019821	G	A	-0.0244707	0.00250738	1.69981e-22	0.175322	95.2473
rs79578535	A	G	-0.0141426	0.00191176	1.39991e-13	0.458788	54.7258
rs77585170	C	T	-0.0151077	0.00210388	6.89922e-13	0.309854	51.565
rs12502592	T	C	0.0118698	0.00191595	5.80003e-10	0.45513	38.3812
rs9790831	T	G	0.0106615	0.00191346	2.5e-08	0.512173	31.0454
rs6531734	T	C	0.0140251	0.00190973	2.09991e-13	0.505231	53.9347
rs2631242	T	C	-0.0693828	0.00395255	5.60015e-69	0.061925	308.141
rs11736322	C	T	0.0193339	0.00196721	8.49963e-23	0.608329	96.5912
rs11943915	C	T	-0.0720632	0.00355249	1.69981e-91	0.08326	411.492
rs73836548	T	C	0.0287697	0.00228054	1.69981e-36	0.773134	159.146
rs17522932	C	T	0.0170162	0.00236408	6.09958e-13	0.205919	51.8085
rs11133715	G	A	-0.0122469	0.00201433	1.2e-09	0.338422	36.965
rs62357766	C	G	-0.0136422	0.00208085	5.50047e-11	0.301994	42.9821
rs6877596	G	A	-0.0108702	0.00194234	2.19999e-08	0.403698	31.3202
rs148910119	G	C	-0.0107267	0.00194152	3.29997e-08	0.40352	30.5245
rs140083551	C	T	-0.0108908	0.00194197	2e-08	0.4052	31.451
rs72750252	A	G	0.0306812	0.00405622	3.90032e-14	0.939201	57.2139
rs16876498	T	C	-0.0138197	0.00209271	4.00037e-11	0.292674	43.6093
rs78474539	G	T	-0.0113905	0.00196828	7.19996e-09	0.615419	33.4897
rs79307036	T	C	0.0117706	0.00199813	3.79997e-09	0.350826	34.7016
rs34853654	C	T	0.0120071	0.00195336	7.90005e-10	0.390258	37.7843
rs116301445	G	A	0.0118103	0.00195325	1.5e-09	0.390269	36.56
rs112433776	G	T	0.0114695	0.00195557	4.49997e-09	0.391345	34.3987
rs79272242	C	T	0.0116118	0.00199076	5.39995e-09	0.356443	34.0221
rs401327	T	A	-0.0111295	0.00195815	1.29999e-08	0.601311	32.3042
rs145175012	C	T	0.0165116	0.00221874	9.8992e-14	0.247172	55.3816
rs139897485	A	G	-0.0152194	0.00218824	3.50026e-12	0.741509	48.3732
rs114402902	T	C	-0.0148301	0.00221945	2.39994e-11	0.755456	44.6475
rs139461824	G	A	-0.0653257	0.0116605	2.1e-08	0.007152	31.3858
rs77770966	G	A	0.013273	0.00233969	1.40001e-08	0.378233	32.1826
rs72843729	C	T	-0.0212647	0.00293345	4.19952e-13	0.118987	52.5486
rs9468177	C	T	-0.0245291	0.00297709	1.69981e-16	0.115257	67.8859
rs145599127	C	T	-0.026528	0.00290219	6.20012e-20	0.124962	83.5521
rs7770049	G	A	-0.0281756	0.00282077	1.69981e-23	0.131257	99.7725
rs137981582	A	G	-0.0254195	0.00269231	3.69999e-21	0.147551	89.1423
rs146149514	G	A	0.0215076	0.00252775	1.80011e-17	0.824072	72.3962
rs112039377	G	A	0.0156241	0.00207404	5.00035e-14	0.701882	56.7487
rs112496462	G	A	-0.0550636	0.00452407	4.40048e-34	0.046516	148.139
rs28405247	G	C	0.0563239	0.00474851	1.9002e-32	0.955548	140.692
rs72900436	G	A	-0.0260467	0.0020685	2.29985e-36	0.304909	158.56
rs9366860	T	C	-0.0236535	0.00202312	1.39991e-31	0.32967	136.693
rs144019847	G	A	-0.0286223	0.00274041	1.59993e-25	0.13993	109.088
rs148937140	C	T	-0.0239249	0.00202569	3.40017e-32	0.327998	139.494
rs143755507	G	A	0.0298544	0.00224975	3.50026e-40	0.759489	176.095
rs111934162	C	A	0.0240171	0.00202554	1.99986e-32	0.671796	140.592
rs146291514	C	T	0.0162876	0.00193528	3.90032e-17	0.422372	70.8315
rs7760549	T	C	0.0159614	0.00193023	1.29987e-16	0.41867	68.3792
rs117324082	T	C	0.0180485	0.00326788	3.29997e-08	0.103342	30.5035
rs138218402	T	G	0.0109845	0.00199533	3.69999e-08	0.36118	30.3062
rs117075852	C	T	0.0246907	0.0026894	4.30031e-20	0.147261	84.2861
rs62430969	A	G	0.0254203	0.00268154	2.49977e-21	0.148206	89.8655
rs77550036	T	G	-0.0204037	0.00192176	2.49977e-26	0.441255	112.725
rs138658884	G	C	0.024245	0.00224793	4.00037e-27	0.248642	116.327
rs111510370	G	A	0.0252022	0.00220484	2.90001e-30	0.249491	130.654
rs116906269	A	G	0.0179312	0.00191063	6.29941e-21	0.461439	88.0776
rs80242092	G	T	0.0265159	0.00223353	1.69981e-32	0.238577	140.938
rs73057312	C	T	0.0258181	0.00214379	2.09991e-33	0.273616	145.039
rs35062734	C	T	0.026787	0.0022388	5.40008e-33	0.237446	143.159
rs185547176	G	A	0.0264995	0.00223548	1.99986e-32	0.237972	140.519
rs112224495	G	A	-0.0261601	0.00224748	2.60016e-31	0.761249	135.484
rs10225030	G	T	0.0113899	0.00197483	8e-09	0.380152	33.2645
rs11979983	C	A	-0.0277244	0.00451484	8.19993e-10	0.04717	37.7085
rs144989574	G	A	-0.0277706	0.00450748	7.19996e-10	0.046979	37.958
rs117560133	G	A	0.02802	0.00452137	5.69994e-10	0.952826	38.4057
rs116306774	G	A	0.0351829	0.00566487	5.30005e-10	0.031503	38.573
rs7838144	C	T	0.0112399	0.00197917	1.40001e-08	0.635428	32.2522
rs117309468	G	T	-0.0179242	0.00263469	1e-11	0.152904	46.2829
rs12678300	G	A	-0.0150661	0.00193097	6.09958e-15	0.412192	60.8766
rs78249000	A	G	-0.0161996	0.00225974	7.59976e-13	0.239127	51.3915
rs57997896	T	C	-0.0250742	0.00352053	1.10002e-12	0.078769	50.7269
rs62511738	C	T	-0.020561	0.00190619	4.00037e-27	0.504367	116.347
rs10097784	C	A	0.0316017	0.00191946	6.70039e-61	0.568605	271.058
rs74337560	T	C	0.0113326	0.00193407	4.60002e-09	0.583573	34.3332
rs56280815	C	T	-0.0168064	0.00210559	1.39991e-15	0.717966	63.7091
rs118078018	G	T	-0.0149879	0.00202026	1.20005e-13	0.654353	55.0386
rs6420183	C	T	0.0155724	0.00208019	7.10068e-14	0.295881	56.0409
rs11774034	G	A	0.0331985	0.00243942	3.50026e-42	0.185003	185.21
rs148858677	G	A	-0.0186233	0.0021686	8.9002e-18	0.722952	73.7487
rs147985236	C	T	-0.0125953	0.00190799	4.10015e-11	0.438675	43.5778
rs10962545	C	A	-0.0139757	0.00245569	1.29999e-08	0.186415	32.3892
rs117902958	G	A	-0.0150892	0.0024382	6.1e-10	0.809574	38.2996
rs117148840	T	C	0.0150384	0.0024299	6.1e-10	0.190265	38.3024
rs151042416	G	A	0.0152033	0.0024344	4.20001e-10	0.189293	39.0024
rs72746870	G	A	0.0153721	0.00244148	3.09999e-10	0.188852	39.6424
rs139404317	A	G	0.0127464	0.00218186	5.19996e-09	0.257175	34.1288
rs140277194	C	T	0.0129743	0.00218371	2.80001e-09	0.255892	35.3003
rs139630739	G	T	0.013147	0.00218343	1.7e-09	0.255822	36.2556
rs112639576	T	C	0.0152447	0.0023168	4.70002e-11	0.216224	43.2973
rs112724189	T	C	0.0124919	0.0020782	1.79999e-09	0.409633	36.1312
rs167202	T	C	-0.0130611	0.00218152	2.1e-09	0.74339	35.846
rs2028002	T	C	-0.0225327	0.00277269	4.40048e-16	0.863453	66.0426
rs7082679	G	T	0.0127581	0.00193081	3.90032e-11	0.423107	43.6609
rs145948481	A	G	0.0165056	0.0030087	4.09996e-08	0.112986	30.0957
rs181900507	A	G	0.0166597	0.00301764	3.40001e-08	0.112469	30.4789
rs61855867	G	C	0.0178438	0.00304998	4.90004e-09	0.109643	34.2279
rs113080497	G	T	-0.0177543	0.00304954	5.80003e-09	0.89029	33.8952
rs55658310	T	G	0.0178302	0.0030496	5e-09	0.109702	34.1843
rs191178220	C	T	0.0122534	0.00208854	4.39997e-09	0.698976	34.4213
rs76698944	C	T	0.0249725	0.00252225	4.10015e-23	0.173927	98.0275
rs78553679	G	A	-0.0288855	0.00223218	2.70023e-38	0.759646	167.456
rs3740109	T	C	0.0287501	0.00223129	5.50047e-38	0.240967	166.022
rs112294514	G	A	0.0287061	0.00223222	7.59976e-38	0.239721	165.377
rs61854121	T	C	-0.0157172	0.00225221	2.99985e-12	0.235883	48.7004
rs368332850	A	C	0.0233575	0.00309519	4.49987e-14	0.121654	56.9479
rs189062809	A	G	-0.0111787	0.00191522	5.30005e-09	0.522852	34.0679
rs12217502	C	T	-0.0107058	0.0019365	3.2e-08	0.414545	30.5635
rs11594323	G	A	0.0147726	0.00190498	8.9002e-15	0.496294	60.1358
rs2007210	T	C	0.013348	0.00191821	3.40017e-12	0.442441	48.4217
rs6585563	C	A	0.0112974	0.00199049	1.40001e-08	0.599226	32.2134
rs73379040	G	A	0.0107822	0.00191157	1.7e-08	0.520384	31.8152
rs6597869	G	A	-0.0116112	0.00191759	1.40001e-09	0.457743	36.6642
rs2949367	G	A	-0.0120543	0.00197157	9.69996e-10	0.395696	37.3817
rs2239897	A	G	0.0151419	0.00265537	1.2e-08	0.842319	32.517
rs148983767	G	C	0.0258739	0.00329732	4.30031e-15	0.906722	61.5746
rs438263	C	A	-0.039668	0.00664889	2.39999e-09	0.027736	35.5945
rs1717773	T	C	-0.0113087	0.00195694	7.49998e-09	0.383497	33.3941
rs117185352	A	G	-0.0113982	0.00196218	6.29999e-09	0.383505	33.7439
rs147556125	G	A	0.0408064	0.00281212	1e-47	0.132042	210.566
rs112395972	C	T	0.0427893	0.00296613	3.59998e-47	0.116153	208.109
rs150484219	A	G	0.0404208	0.00280597	4.79954e-47	0.132356	207.512
rs4881826	G	C	0.0403948	0.00280473	5.00035e-47	0.132369	207.429
rs147078827	T	C	0.0442061	0.00301538	1.20005e-48	0.113763	214.922
rs371438231	G	A	0.0383461	0.00297755	6.00067e-38	0.140093	165.853
rs144373124	C	T	0.0405854	0.00283994	2.49977e-46	0.128074	204.231
rs2553193	G	A	-0.0348429	0.00534467	7.10068e-11	0.033381	42.4998
rs139438701	G	T	-0.0404576	0.00288391	1e-44	0.875378	196.805
rs147745100	A	T	0.0407016	0.00289203	5.50047e-45	0.12393	198.069
rs563988505	C	A	0.0278101	0.00235013	2.60016e-32	0.206365	140.03
rs151166354	C	A	0.0391462	0.00363202	4.40048e-27	0.074529	116.167
rs76320161	A	C	0.030696	0.00386541	1.99986e-15	0.064772	63.0627
rs71465403	T	C	-0.0171335	0.00206171	9.49948e-17	0.312837	69.0617
rs2229738	C	T	-0.0175762	0.0020553	1.20005e-17	0.314879	73.1307
rs3794020	C	T	0.0128644	0.00192143	2.19989e-11	0.562994	44.826
rs75487124	C	T	-0.0111111	0.00201992	3.79997e-08	0.445408	30.2584
rs150185361	C	T	0.0120175	0.00219867	4.60002e-08	0.250834	29.875
rs145356133	C	G	0.0120172	0.0022015	4.79999e-08	0.250637	29.7968
rs17110728	T	C	-0.0151435	0.00207541	2.99985e-13	0.700304	53.2408
rs12574790	C	T	-0.0870439	0.00366625	1.30017e-124	0.072812	563.68
rs180366	C	T	-0.0996839	0.00273181	1e-200	0.141543	1331.52
rs193108398	G	A	0.105396	0.00375914	5.70164e-173	0.931121	786.088
rs78544409	G	A	0.0326346	0.00222865	1.50003e-48	0.238854	214.424
rs11216236	C	T	0.0702594	0.00537008	4.10015e-39	0.032454	171.178
rs61906492	G	A	-0.168059	0.0108337	2.80027e-54	0.0094	240.641
rs79000353	G	A	0.0191268	0.00287846	2.99985e-11	0.124939	44.1534
rs117694374	T	C	-0.0178035	0.00194467	5.40008e-20	0.401164	83.8145
rs35384663	C	G	0.0145375	0.00191843	3.50026e-14	0.443491	57.4232
rs192448	A	G	0.0283661	0.00240558	4.30031e-32	0.197605	139.046
rs11835323	T	C	-0.0138206	0.00191176	4.90004e-13	0.504483	52.2621
rs17467456	G	A	-0.0142256	0.00224301	2.30001e-10	0.236024	40.2234
rs1872937	G	C	0.025052	0.0043069	5.99998e-09	0.051426	33.8341
rs3001428	A	G	0.0137923	0.00205352	1.9002e-11	0.313785	45.1103
rs7979451	C	T	-0.0260946	0.003328	4.49987e-15	0.093843	61.4801
rs117113194	G	A	-0.0254124	0.00222423	3.10027e-30	0.251071	130.537
rs140255867	A	G	0.0302018	0.00222558	6.00067e-42	0.239606	184.153
rs144609873	G	A	0.0296161	0.00224898	1.29987e-39	0.233988	173.414
rs73133366	G	A	-0.0264629	0.00221349	6.09958e-33	0.245323	142.929
rs117605132	A	G	0.0306111	0.00222442	4.40048e-43	0.240851	189.376
rs113229733	G	A	0.0304841	0.00222196	7.8001e-43	0.241056	188.224
rs117118210	C	T	0.016227	0.00197953	2.49977e-16	0.638225	67.1974
rs143914965	C	T	0.0121982	0.00201242	1.29999e-09	0.654287	36.7413
rs57979070	C	T	0.0122908	0.00200988	9.59997e-10	0.654968	37.3956
rs11176658	G	A	0.0122544	0.00200687	1e-09	0.655623	37.286
rs739497	C	T	0.0250677	0.00190484	1.50003e-39	0.503641	173.186
rs146115249	A	T	-0.0198667	0.00245807	6.4003e-16	0.79643	65.3225
rs55843500	A	G	-0.228742	0.0241814	3.10027e-21	0.001713	89.4806
rs60377947	A	G	-0.0127402	0.00229732	2.90001e-08	0.230807	30.7546
rs9554242	A	G	-0.0139195	0.00231375	1.79999e-09	0.220807	36.1922
rs76927655	A	G	0.0167628	0.00201624	9.30037e-17	0.662558	69.1208
rs12593315	G	A	0.0178376	0.00192587	1.99986e-20	0.568943	85.7865
rs11856618	C	A	-0.0189711	0.00245999	1.20005e-14	0.186398	59.4728
rs181902229	C	T	0.0157379	0.00227339	4.40048e-12	0.770973	47.9232
rs75358228	A	G	0.0125185	0.00192414	7.70016e-11	0.563621	42.3283
rs78590919	T	A	0.0130404	0.00191346	9.3994e-12	0.547921	46.4454
rs117356077	T	C	0.0129273	0.00192015	1.69981e-11	0.561685	45.3258
rs368427659	C	G	-0.0123952	0.0022491	3.59998e-08	0.586562	30.3731
rs370188553	G	A	-0.017756	0.00206272	7.39946e-18	0.296247	74.0986
rs71387165	C	T	0.0389678	0.00443893	1.69981e-18	0.952535	77.0646
rs223849	A	T	0.0152005	0.00206863	1.99986e-13	0.700459	53.9946
rs72799802	G	A	-0.0148033	0.00247139	2.1e-09	0.176548	35.8785
rs117753658	A	G	0.0168828	0.00259057	7.19946e-11	0.843286	42.4716
rs71386932	G	A	0.0154987	0.00217622	1.10002e-12	0.748903	50.7207
rs143307443	A	G	0.0147609	0.00214207	5.50047e-12	0.738507	47.4852
rs11869864	C	A	0.01845	0.00202095	6.90081e-20	0.658521	83.3454
rs147574535	G	A	0.0145006	0.00198696	2.90001e-13	0.365799	53.2591
rs894505	G	C	-0.0129815	0.00192673	1.59993e-11	0.549495	45.395
rs11652218	C	T	0.0108069	0.00190884	1.5e-08	0.498506	32.0526
rs77205434	C	T	-0.0118752	0.00217032	4.49997e-08	0.738076	29.9388
rs16945343	A	G	0.0118439	0.00216701	4.60002e-08	0.262042	29.8722
rs4940679	G	A	-0.041784	0.00685906	1.09999e-09	0.020182	37.11
rs9954353	A	G	-0.0229777	0.00215861	1.80011e-26	0.267061	113.309
rs73961491	C	T	-0.0225466	0.00215819	1.50003e-25	0.265738	109.14
rs12480772	T	C	-0.0561705	0.00378563	8.30042e-50	0.072092	220.161
rs139261645	T	C	-0.0150772	0.00207569	3.80014e-13	0.40284	52.7614
rs144044427	A	T	-0.0957074	0.0142514	1.9002e-11	0.005311	45.0999
rs816931	A	G	0.0115805	0.00191653	1.5e-09	0.489505	36.511
rs2776040	C	G	0.0119424	0.00201653	3.2e-09	0.639719	35.0731
rs55931418	C	G	-0.0110835	0.00197137	1.89998e-08	0.427527	31.6095

## Sheet: Supplementary Table 5
Supplementary Table 5. Genetic variants that were used as instruments for high-density lipoprotein cholesterol in Finn
SNP	Effect Allele	other allele	Beta	SE	P value	Effect Allele Frequency	F
rs2298214	C	A	-0.01241	0.00194099	1.6e-10	0.577365	40.8787
rs649915	G	A	-0.0236817	0.00378426	3.9e-10	0.067888	39.1619
rs116524683	G	A	0.0155865	0.00272569	1.1e-08	0.858371	32.6997
rs12746810	G	A	-0.0810512	0.00636562	3.9e-37	0.023124	162.12
rs561568918	C	T	-0.0390545	0.00347898	3e-29	0.081325	126.02
rs140476492	G	A	-0.0391338	0.00347974	2.4e-29	0.081326	126.477
rs7545741	C	T	-0.0396939	0.00349612	7.1e-30	0.080514	128.907
rs113287499	G	A	-0.0390876	0.00349695	5.2e-29	0.080529	124.939
rs45596631	C	A	0.0247686	0.00250933	5.6e-23	0.806358	97.4288
rs1187948	T	C	-0.0385629	0.00351469	5.2e-28	0.079546	120.383
rs7541717	A	G	-0.0110251	0.00200967	4.1e-08	0.337684	30.0965
rs79029362	T	G	-0.0179072	0.00190707	6e-21	0.533101	88.1703
rs6684959	C	T	0.0168151	0.00193741	4e-18	0.411262	75.3279
rs78030888	C	G	0.0124552	0.00191594	8e-11	0.534727	42.2608
rs111491640	C	A	-0.0115703	0.00197461	4.6e-09	0.37001	34.3342
rs67788756	C	T	-0.0246494	0.00204396	1.7e-33	0.318148	145.435
rs75216965	T	A	-0.0257183	0.00202534	6e-37	0.328694	161.246
rs2452903	G	A	-0.0256001	0.00202475	1.2e-36	0.328843	159.86
rs111567021	T	A	-0.0227455	0.001981	1.6e-30	0.3595	131.832
rs20562	C	A	-0.0106144	0.00191671	3.1e-08	0.430009	30.6675
rs143494487	A	G	0.0106138	0.00191673	3.1e-08	0.569991	30.6634
rs78591588	T	A	0.0105995	0.0019284	3.9e-08	0.416552	30.2118
rs140584697	T	G	-0.0141903	0.00193233	2.1e-13	0.589773	53.9288
rs74971325	T	C	-0.0148213	0.00191599	1e-14	0.564083	59.8392
rs115945763	G	A	-0.0144628	0.00255581	1.5e-08	0.168679	32.0219
rs143658239	A	G	0.0129082	0.00200046	1.1e-10	0.343757	41.6363
rs60326124	G	A	0.0276562	0.00207854	2.1e-40	0.702698	177.039
rs59234976	T	C	0.0244942	0.00204744	5.5e-33	0.685451	143.121
rs72470595	T	C	0.0240027	0.00204068	6.1e-32	0.682364	138.347
rs72470598	A	C	0.0168013	0.00202404	1e-16	0.338948	68.9045
rs114012769	A	T	0.017517	0.00214168	2.9e-16	0.270963	66.8976
rs137863666	C	T	0.0181197	0.00247467	2.4e-13	0.816933	53.6127
rs115762034	G	A	0.0109437	0.00190935	9.9e-09	0.495081	32.8517
rs3789126	G	A	-0.0117141	0.00208231	1.8e-08	0.3012	31.6466
rs60286362	G	C	-0.0245707	0.00389756	2.9e-10	0.0635	39.742
rs778106	G	A	0.0115764	0.00195967	3.5e-09	0.615432	34.8964
rs114892556	A	G	-0.014443	0.00247997	5.8e-09	0.820883	33.9174
rs72932409	T	G	0.0138213	0.0022041	3.6e-10	0.247521	39.322
rs111973496	A	G	0.0123164	0.00191647	1.3e-10	0.446048	41.3013
rs13415932	A	C	0.0131939	0.00197851	2.6e-11	0.365039	44.4703
rs76772145	A	T	-0.0189073	0.00204367	2.2e-20	0.315582	85.5929
rs150357933	T	G	0.0138368	0.00196258	1.8e-12	0.403795	49.7069
rs13032993	T	C	-0.0783702	0.00490443	1.8e-57	0.050415	255.344
rs61733623	A	G	-0.0968681	0.0136949	1.5e-12	0.005078	50.0315
rs187153158	T	C	-0.0135803	0.00192691	1.8e-12	0.558801	49.6702
rs76082446	G	A	-0.0153581	0.00195629	4.1e-15	0.546852	61.6323
rs138217869	A	G	0.0112872	0.00193418	5.4e-09	0.581762	34.0548
rs4241399	T	C	-0.0117938	0.00195024	1.5e-09	0.550839	36.5705
rs72626372	A	G	-0.0122221	0.00222351	3.9e-08	0.241559	30.2144
rs79300291	A	C	-0.0157929	0.00239422	4.2e-11	0.197806	43.5107
rs114058810	C	T	-0.0158394	0.00239381	3.7e-11	0.197935	43.7823
rs62264119	A	G	-0.0157962	0.00237313	2.8e-11	0.202401	44.306
rs34980487	C	T	-0.0139134	0.00233601	2.6e-09	0.212259	35.4746
rs28886962	T	C	-0.0108705	0.00197487	3.7e-08	0.368579	30.2986
rs1022186	C	T	0.0255176	0.00257969	4.5e-23	0.833311	97.8463
rs35019821	G	A	-0.0244707	0.00250738	1.7e-22	0.175322	95.2473
rs79578535	A	G	-0.0141426	0.00191176	1.4e-13	0.458788	54.7258
rs77585170	C	T	-0.0151077	0.00210388	6.9e-13	0.309854	51.565
rs12502592	T	C	0.0118698	0.00191595	5.8e-10	0.45513	38.3812
rs9790831	T	G	0.0106615	0.00191346	2.5e-08	0.512173	31.0454
rs6531734	T	C	0.0140251	0.00190973	2.1e-13	0.505231	53.9347
rs2631242	T	C	-0.0693828	0.00395255	5.6e-69	0.061925	308.141
rs11736322	C	T	0.0193339	0.00196721	8.5e-23	0.608329	96.5912
rs11943915	C	T	-0.0720632	0.00355249	1.7e-91	0.08326	411.492
rs73836548	T	C	0.0287697	0.00228054	1.7e-36	0.773134	159.146
rs17522932	C	T	0.0170162	0.00236408	6.1e-13	0.205919	51.8085
rs11133715	G	A	-0.0122469	0.00201433	1.2e-09	0.338422	36.965
rs62357766	C	G	-0.0136422	0.00208085	5.5e-11	0.301994	42.9821
rs6877596	G	A	-0.0108702	0.00194234	2.2e-08	0.403698	31.3202
rs148910119	G	C	-0.0107267	0.00194152	3.3e-08	0.40352	30.5245
rs140083551	C	T	-0.0108908	0.00194197	2e-08	0.4052	31.451
rs72750252	A	G	0.0306812	0.00405622	3.9e-14	0.939201	57.2139
rs16876498	T	C	-0.0138197	0.00209271	4e-11	0.292674	43.6093
rs78474539	G	T	-0.0113905	0.00196828	7.2e-09	0.615419	33.4897
rs79307036	T	C	0.0117706	0.00199813	3.8e-09	0.350826	34.7016
rs34853654	C	T	0.0120071	0.00195336	7.9e-10	0.390258	37.7843
rs116301445	G	A	0.0118103	0.00195325	1.5e-09	0.390269	36.56
rs112433776	G	T	0.0114695	0.00195557	4.5e-09	0.391345	34.3987
rs79272242	C	T	0.0116118	0.00199076	5.4e-09	0.356443	34.0221
rs401327	T	A	-0.0111295	0.00195815	1.3e-08	0.601311	32.3042
rs145175012	C	T	0.0165116	0.00221874	9.9e-14	0.247172	55.3816
rs139897485	A	G	-0.0152194	0.00218824	3.5e-12	0.741509	48.3732
rs114402902	T	C	-0.0148301	0.00221945	2.4e-11	0.755456	44.6475
rs139461824	G	A	-0.0653257	0.0116605	2.1e-08	0.007152	31.3858
rs77770966	G	A	0.013273	0.00233969	1.4e-08	0.378233	32.1826
rs72843729	C	T	-0.0212647	0.00293345	4.2e-13	0.118987	52.5486
rs9468177	C	T	-0.0245291	0.00297709	1.7e-16	0.115257	67.8859
rs145599127	C	T	-0.026528	0.00290219	6.2e-20	0.124962	83.5521
rs7770049	G	A	-0.0281756	0.00282077	1.7e-23	0.131257	99.7725
rs137981582	A	G	-0.0254195	0.00269231	3.7e-21	0.147551	89.1423
rs146149514	G	A	0.0215076	0.00252775	1.8e-17	0.824072	72.3962
rs112039377	G	A	0.0156241	0.00207404	5e-14	0.701882	56.7487
rs112496462	G	A	-0.0550636	0.00452407	4.4e-34	0.046516	148.139
rs28405247	G	C	0.0563239	0.00474851	1.9e-32	0.955548	140.692
rs72900436	G	A	-0.0260467	0.0020685	2.3e-36	0.304909	158.56
rs9366860	T	C	-0.0236535	0.00202312	1.4e-31	0.32967	136.693
rs144019847	G	A	-0.0286223	0.00274041	1.6e-25	0.13993	109.088
rs148937140	C	T	-0.0239249	0.00202569	3.4e-32	0.327998	139.494
rs143755507	G	A	0.0298544	0.00224975	3.5e-40	0.759489	176.095
rs111934162	C	A	0.0240171	0.00202554	2e-32	0.671796	140.592
rs146291514	C	T	0.0162876	0.00193528	3.9e-17	0.422372	70.8315
rs7760549	T	C	0.0159614	0.00193023	1.3e-16	0.41867	68.3792
rs117324082	T	C	0.0180485	0.00326788	3.3e-08	0.103342	30.5035
rs138218402	T	G	0.0109845	0.00199533	3.7e-08	0.36118	30.3062
rs117075852	C	T	0.0246907	0.0026894	4.3e-20	0.147261	84.2861
rs62430969	A	G	0.0254203	0.00268154	2.5e-21	0.148206	89.8655
rs77550036	T	G	-0.0204037	0.00192176	2.5e-26	0.441255	112.725
rs138658884	G	C	0.024245	0.00224793	4e-27	0.248642	116.327
rs111510370	G	A	0.0252022	0.00220484	2.9e-30	0.249491	130.654
rs116906269	A	G	0.0179312	0.00191063	6.3e-21	0.461439	88.0776
rs80242092	G	T	0.0265159	0.00223353	1.7e-32	0.238577	140.938
rs73057312	C	T	0.0258181	0.00214379	2.1e-33	0.273616	145.039
rs35062734	C	T	0.026787	0.0022388	5.4e-33	0.237446	143.159
rs185547176	G	A	0.0264995	0.00223548	2e-32	0.237972	140.519
rs112224495	G	A	-0.0261601	0.00224748	2.6e-31	0.761249	135.484
rs10225030	G	T	0.0113899	0.00197483	8e-09	0.380152	33.2645
rs11979983	C	A	-0.0277244	0.00451484	8.2e-10	0.04717	37.7085
rs144989574	G	A	-0.0277706	0.00450748	7.2e-10	0.046979	37.958
rs117560133	G	A	0.02802	0.00452137	5.7e-10	0.952826	38.4057
rs116306774	G	A	0.0351829	0.00566487	5.3e-10	0.031503	38.573
rs7838144	C	T	0.0112399	0.00197917	1.4e-08	0.635428	32.2522
rs117309468	G	T	-0.0179242	0.00263469	1e-11	0.152904	46.2829
rs12678300	G	A	-0.0150661	0.00193097	6.1e-15	0.412192	60.8766
rs78249000	A	G	-0.0161996	0.00225974	7.6e-13	0.239127	51.3915
rs57997896	T	C	-0.0250742	0.00352053	1.1e-12	0.078769	50.7269
rs62511738	C	T	-0.020561	0.00190619	4e-27	0.504367	116.347
rs10097784	C	A	0.0316017	0.00191946	6.7e-61	0.568605	271.058
rs74337560	T	C	0.0113326	0.00193407	4.6e-09	0.583573	34.3332
rs56280815	C	T	-0.0168064	0.00210559	1.4e-15	0.717966	63.7091
rs118078018	G	T	-0.0149879	0.00202026	1.2e-13	0.654353	55.0386
rs6420183	C	T	0.0155724	0.00208019	7.1e-14	0.295881	56.0409
rs11774034	G	A	0.0331985	0.00243942	3.5e-42	0.185003	185.21
rs148858677	G	A	-0.0186233	0.0021686	8.9e-18	0.722952	73.7487
rs147985236	C	T	-0.0125953	0.00190799	4.1e-11	0.438675	43.5778
rs10962545	C	A	-0.0139757	0.00245569	1.3e-08	0.186415	32.3892
rs117902958	G	A	-0.0150892	0.0024382	6.1e-10	0.809574	38.2996
rs117148840	T	C	0.0150384	0.0024299	6.1e-10	0.190265	38.3024
rs151042416	G	A	0.0152033	0.0024344	4.2e-10	0.189293	39.0024
rs72746870	G	A	0.0153721	0.00244148	3.1e-10	0.188852	39.6424
rs139404317	A	G	0.0127464	0.00218186	5.2e-09	0.257175	34.1288
rs140277194	C	T	0.0129743	0.00218371	2.8e-09	0.255892	35.3003
rs139630739	G	T	0.013147	0.00218343	1.7e-09	0.255822	36.2556
rs112639576	T	C	0.0152447	0.0023168	4.7e-11	0.216224	43.2973
rs112724189	T	C	0.0124919	0.0020782	1.8e-09	0.409633	36.1312
rs167202	T	C	-0.0130611	0.00218152	2.1e-09	0.74339	35.846
rs2028002	T	C	-0.0225327	0.00277269	4.4e-16	0.863453	66.0426
rs7082679	G	T	0.0127581	0.00193081	3.9e-11	0.423107	43.6609
rs145948481	A	G	0.0165056	0.0030087	4.1e-08	0.112986	30.0957
rs181900507	A	G	0.0166597	0.00301764	3.4e-08	0.112469	30.4789
rs61855867	G	C	0.0178438	0.00304998	4.9e-09	0.109643	34.2279
rs113080497	G	T	-0.0177543	0.00304954	5.8e-09	0.89029	33.8952
rs55658310	T	G	0.0178302	0.0030496	5e-09	0.109702	34.1843
rs191178220	C	T	0.0122534	0.00208854	4.4e-09	0.698976	34.4213
rs76698944	C	T	0.0249725	0.00252225	4.1e-23	0.173927	98.0275
rs78553679	G	A	-0.0288855	0.00223218	2.7e-38	0.759646	167.456
rs3740109	T	C	0.0287501	0.00223129	5.5e-38	0.240967	166.022
rs112294514	G	A	0.0287061	0.00223222	7.6e-38	0.239721	165.377
rs61854121	T	C	-0.0157172	0.00225221	3e-12	0.235883	48.7004
rs368332850	A	C	0.0233575	0.00309519	4.5e-14	0.121654	56.9479
rs189062809	A	G	-0.0111787	0.00191522	5.3e-09	0.522852	34.0679
rs12217502	C	T	-0.0107058	0.0019365	3.2e-08	0.414545	30.5635
rs11594323	G	A	0.0147726	0.00190498	8.9e-15	0.496294	60.1358
rs2007210	T	C	0.013348	0.00191821	3.4e-12	0.442441	48.4217
rs6585563	C	A	0.0112974	0.00199049	1.4e-08	0.599226	32.2134
rs73379040	G	A	0.0107822	0.00191157	1.7e-08	0.520384	31.8152
rs6597869	G	A	-0.0116112	0.00191759	1.4e-09	0.457743	36.6642
rs2949367	G	A	-0.0120543	0.00197157	9.7e-10	0.395696	37.3817
rs2239897	A	G	0.0151419	0.00265537	1.2e-08	0.842319	32.517
rs148983767	G	C	0.0258739	0.00329732	4.3e-15	0.906722	61.5746
rs438263	C	A	-0.039668	0.00664889	2.4e-09	0.027736	35.5945
rs1717773	T	C	-0.0113087	0.00195694	7.5e-09	0.383497	33.3941
rs117185352	A	G	-0.0113982	0.00196218	6.3e-09	0.383505	33.7439
rs147556125	G	A	0.0408064	0.00281212	1e-47	0.132042	210.566
rs112395972	C	T	0.0427893	0.00296613	3.6e-47	0.116153	208.109
rs150484219	A	G	0.0404208	0.00280597	4.8e-47	0.132356	207.512
rs4881826	G	C	0.0403948	0.00280473	5e-47	0.132369	207.429
rs147078827	T	C	0.0442061	0.00301538	1.2e-48	0.113763	214.922
rs371438231	G	A	0.0383461	0.00297755	6e-38	0.140093	165.853
rs144373124	C	T	0.0405854	0.00283994	2.5e-46	0.128074	204.231
rs2553193	G	A	-0.0348429	0.00534467	7.1e-11	0.033381	42.4998
rs139438701	G	T	-0.0404576	0.00288391	1e-44	0.875378	196.805
rs147745100	A	T	0.0407016	0.00289203	5.5e-45	0.12393	198.069
rs563988505	C	A	0.0278101	0.00235013	2.6e-32	0.206365	140.03
rs151166354	C	A	0.0391462	0.00363202	4.4e-27	0.074529	116.167
rs76320161	A	C	0.030696	0.00386541	2e-15	0.064772	63.0627
rs71465403	T	C	-0.0171335	0.00206171	9.5e-17	0.312837	69.0617
rs2229738	C	T	-0.0175762	0.0020553	1.2e-17	0.314879	73.1307
rs3794020	C	T	0.0128644	0.00192143	2.2e-11	0.562994	44.826
rs75487124	C	T	-0.0111111	0.00201992	3.8e-08	0.445408	30.2584
rs150185361	C	T	0.0120175	0.00219867	4.6e-08	0.250834	29.875
rs145356133	C	G	0.0120172	0.0022015	4.8e-08	0.250637	29.7968
rs17110728	T	C	-0.0151435	0.00207541	3e-13	0.700304	53.2408
rs12574790	C	T	-0.0870439	0.00366625	1.3e-124	0.072812	563.68
rs180366	C	T	-0.0996839	0.00273181	1e-200	0.141543	1331.52
rs193108398	G	A	0.105396	0.00375914	5.7e-173	0.931121	786.088
rs78544409	G	A	0.0326346	0.00222865	1.5e-48	0.238854	214.424
rs11216236	C	T	0.0702594	0.00537008	4.1e-39	0.032454	171.178
rs61906492	G	A	-0.168059	0.0108337	2.8e-54	0.0094	240.641
rs79000353	G	A	0.0191268	0.00287846	3e-11	0.124939	44.1534
rs117694374	T	C	-0.0178035	0.00194467	5.4e-20	0.401164	83.8145
rs35384663	C	G	0.0145375	0.00191843	3.5e-14	0.443491	57.4232
rs192448	A	G	0.0283661	0.00240558	4.3e-32	0.197605	139.046
rs11835323	T	C	-0.0138206	0.00191176	4.9e-13	0.504483	52.2621
rs17467456	G	A	-0.0142256	0.00224301	2.3e-10	0.236024	40.2234
rs1872937	G	C	0.025052	0.0043069	6e-09	0.051426	33.8341
rs3001428	A	G	0.0137923	0.00205352	1.9e-11	0.313785	45.1103
rs7979451	C	T	-0.0260946	0.003328	4.5e-15	0.093843	61.4801
rs117113194	G	A	-0.0254124	0.00222423	3.1e-30	0.251071	130.537
rs140255867	A	G	0.0302018	0.00222558	6e-42	0.239606	184.153
rs144609873	G	A	0.0296161	0.00224898	1.3e-39	0.233988	173.414
rs73133366	G	A	-0.0264629	0.00221349	6.1e-33	0.245323	142.929
rs117605132	A	G	0.0306111	0.00222442	4.4e-43	0.240851	189.376
rs113229733	G	A	0.0304841	0.00222196	7.8e-43	0.241056	188.224
rs117118210	C	T	0.016227	0.00197953	2.5e-16	0.638225	67.1974
rs143914965	C	T	0.0121982	0.00201242	1.3e-09	0.654287	36.7413
rs57979070	C	T	0.0122908	0.00200988	9.6e-10	0.654968	37.3956
rs11176658	G	A	0.0122544	0.00200687	1e-09	0.655623	37.286
rs739497	C	T	0.0250677	0.00190484	1.5e-39	0.503641	173.186
rs146115249	A	T	-0.0198667	0.00245807	6.4e-16	0.79643	65.3225
rs55843500	A	G	-0.228742	0.0241814	3.1e-21	0.001713	89.4806
rs60377947	A	G	-0.0127402	0.00229732	2.9e-08	0.230807	30.7546
rs9554242	A	G	-0.0139195	0.00231375	1.8e-09	0.220807	36.1922
rs76927655	A	G	0.0167628	0.00201624	9.3e-17	0.662558	69.1208
rs12593315	G	A	0.0178376	0.00192587	2e-20	0.568943	85.7865
rs11856618	C	A	-0.0189711	0.00245999	1.2e-14	0.186398	59.4728
rs181902229	C	T	0.0157379	0.00227339	4.4e-12	0.770973	47.9232
rs75358228	A	G	0.0125185	0.00192414	7.7e-11	0.563621	42.3283
rs78590919	T	A	0.0130404	0.00191346	9.4e-12	0.547921	46.4454
rs117356077	T	C	0.0129273	0.00192015	1.7e-11	0.561685	45.3258
rs368427659	C	G	-0.0123952	0.0022491	3.6e-08	0.586562	30.3731
rs370188553	G	A	-0.017756	0.00206272	7.4e-18	0.296247	74.0986
rs71387165	C	T	0.0389678	0.00443893	1.7e-18	0.952535	77.0646
rs223849	A	T	0.0152005	0.00206863	2e-13	0.700459	53.9946
rs72799802	G	A	-0.0148033	0.00247139	2.1e-09	0.176548	35.8785
rs117753658	A	G	0.0168828	0.00259057	7.2e-11	0.843286	42.4716
rs71386932	G	A	0.0154987	0.00217622	1.1e-12	0.748903	50.7207
rs143307443	A	G	0.0147609	0.00214207	5.5e-12	0.738507	47.4852
rs11869864	C	A	0.01845	0.00202095	6.9e-20	0.658521	83.3454
rs147574535	G	A	0.0145006	0.00198696	2.9e-13	0.365799	53.2591
rs894505	G	C	-0.0129815	0.00192673	1.6e-11	0.549495	45.395
rs11652218	C	T	0.0108069	0.00190884	1.5e-08	0.498506	32.0526
rs77205434	C	T	-0.0118752	0.00217032	4.5e-08	0.738076	29.9388
rs16945343	A	G	0.0118439	0.00216701	4.6e-08	0.262042	29.8722
rs4940679	G	A	-0.041784	0.00685906	1.1e-09	0.020182	37.11
rs9954353	A	G	-0.0229777	0.00215861	1.8e-26	0.267061	113.309
rs73961491	C	T	-0.0225466	0.00215819	1.5e-25	0.265738	109.14
rs12480772	T	C	-0.0561705	0.00378563	8.3e-50	0.072092	220.161
rs139261645	T	C	-0.0150772	0.00207569	3.8e-13	0.40284	52.7614
rs144044427	A	T	-0.0957074	0.0142514	1.9e-11	0.005311	45.0999
rs816931	A	G	0.0115805	0.00191653	1.5e-09	0.489505	36.511
rs2776040	C	G	0.0119424	0.00201653	3.2e-09	0.639719	35.0731
rs55931418	C	G	-0.0110835	0.00197137	1.9e-08	0.427527	31.6095

## Sheet: Supplementary Table 6
Supplementary Table 6. Genetic variants that were used as instruments for TC in Finn
SNP	Effect Allele	other allele	Beta	SE	P value	Effect Allele Frequency	F
rs116524683	G	A	0.0161795	0.00284207	1.2e-08	0.858292	32.4086
rs12746810	G	A	0.0818126	0.00663594	6.29941e-35	0.023157	151.997
rs561568918	C	T	0.0320906	0.00362829	9.20026e-19	0.081348	78.2261
rs79569112	A	G	0.0319675	0.00362677	1.20005e-18	0.081471	77.6922
rs140476492	G	A	0.0321279	0.00362911	8.49963e-19	0.081349	78.3726
rs113287499	G	A	0.0317605	0.00364675	3.10027e-18	0.08056	75.8512
rs45596631	C	A	-0.0180477	0.00261628	5.30029e-12	0.806261	47.5856
rs1187948	T	C	0.0314267	0.00366518	1e-17	0.079576	73.5202
rs1194600	G	C	-0.0205998	0.00219225	5.60015e-21	0.300714	88.297
rs79517397	A	G	0.0122613	0.0021119	6.4e-09	0.33033	33.7075
rs78928125	T	C	-0.0137618	0.00200182	6.20012e-12	0.566781	47.2607
rs12119394	T	G	-0.0149394	0.00262856	1.29999e-08	0.828348	32.3021
rs1894635	A	G	-0.0147102	0.00245321	2e-09	0.793774	35.9557
rs6675811	T	A	-0.0124503	0.0020932	2.69998e-09	0.342465	35.3784
rs12752119	C	A	0.0189651	0.00203258	1.10002e-20	0.57596	87.0593
rs6698475	C	A	0.0193178	0.00202011	1.10002e-21	0.593476	91.4461
rs7553447	C	T	-0.0157175	0.00200177	4.10015e-15	0.439583	61.6508
rs77585907	C	T	0.0417111	0.00217354	4.49987e-82	0.706242	368.271
rs111925401	C	T	-0.0487233	0.00227555	1e-101	0.254467	458.459
rs576520006	A	C	-0.0619716	0.00200008	1e-200	0.436755	960.043
rs190249390	G	A	-0.0538785	0.00204252	2.39883e-153	0.378026	695.822
rs61995753	G	A	-0.0563885	0.00203217	1.79887e-169	0.390204	769.947
rs184559318	G	A	-0.0655892	0.00199596	1e-200	0.445108	1079.84
rs8179210	C	G	-0.0852436	0.00199292	1e-200	0.553881	1829.55
rs8179219	G	A	-0.0834359	0.00199649	1e-200	0.563982	1746.51
rs116361102	G	A	-0.0578181	0.0026973	6.19441e-102	0.160323	459.483
rs144433805	T	C	-0.0793891	0.00226916	1e-200	0.742716	1224.03
rs148539206	G	T	-0.0807196	0.00229959	1e-200	0.749006	1232.13
rs114851137	T	C	-0.0459712	0.00235563	8.10028e-85	0.230105	380.853
rs149508352	G	A	0.0451484	0.00270041	9.49948e-63	0.773973	279.528
rs11892435	A	C	-0.0379643	0.0021282	3.50026e-71	0.39794	318.219
rs74994332	T	C	-0.029794	0.00254644	1.29987e-31	0.185359	136.896
rs72810546	G	A	0.03181	0.00239833	3.80014e-40	0.781604	175.918
rs147417158	T	G	-0.0273612	0.00255309	8.49963e-27	0.195171	114.852
rs114295720	C	T	-0.0163166	0.00217398	6.09958e-14	0.652227	56.3311
rs73936794	G	A	-0.0210824	0.00384512	4.20001e-08	0.925439	30.0622
rs72836335	C	A	-0.0194384	0.00330207	3.89996e-09	0.101812	34.6536
rs72836348	G	A	-0.0125025	0.00198728	3.09999e-10	0.482635	39.58
rs12616953	G	A	0.0119559	0.00199097	1.89998e-09	0.552574	36.0608
rs34409467	A	G	0.0115087	0.00205953	2.30001e-08	0.637515	31.226
rs4674276	A	T	0.0129364	0.00201842	1.5e-10	0.404339	41.0775
rs3795982	T	C	-0.0170157	0.00200433	2.09991e-17	0.432593	72.0711
rs13032993	T	C	0.0816071	0.00510649	1.69981e-57	0.05045	255.394
rs4470446	A	G	-0.0152543	0.00221886	6.20012e-12	0.692404	47.2634
rs75114713	C	G	0.0109684	0.00200571	4.49997e-08	0.430548	29.9054
rs79300291	A	C	0.01458	0.00249783	5.30005e-09	0.197797	34.0713
rs142411318	G	A	0.0147233	0.00247594	2.69998e-09	0.202412	35.3615
rs9864524	G	C	0.0147856	0.00247772	2.39999e-09	0.202649	35.6101
rs28718346	T	C	-0.011795	0.00206065	1e-08	0.376111	32.7633
rs1936032	C	G	-0.0173231	0.00216794	1.29987e-15	0.301897	63.8494
rs3789739	C	T	-0.0305169	0.00205811	9.70063e-50	0.614859	219.859
rs1203107	C	T	0.0242814	0.00202881	5.19996e-33	0.411804	143.24
rs150118124	A	T	0.0198785	0.00215205	2.49977e-20	0.690833	85.3223
rs1022186	C	T	-0.0292341	0.00268763	1.50003e-27	0.83326	118.315
rs35019821	G	A	0.0275925	0.0026118	4.30031e-26	0.175405	111.61
rs79578535	A	G	0.014938	0.00199244	6.4998e-14	0.459007	56.2101
rs77585170	C	T	0.0184434	0.00219279	4.10015e-17	0.309881	70.7437
rs115394305	A	G	-0.011952	0.00206489	7.10003e-09	0.365226	33.5033
rs183658942	C	T	0.0118971	0.00201095	3.29997e-09	0.490806	35.0009
rs6839596	G	A	-0.0120986	0.00199204	1.29999e-09	0.503656	36.8871
rs2631242	T	C	0.0239842	0.00411897	5.80003e-09	0.061932	33.9057
rs11736322	C	T	-0.0121984	0.00205046	2.69998e-09	0.608553	35.3918
rs11943915	C	T	0.0278652	0.00370162	5.19996e-14	0.083291	56.6684
rs73836548	T	C	-0.0141826	0.0023769	2.39999e-09	0.77318	35.6033
rs113863312	G	C	0.016803	0.00226232	1.10002e-13	0.261206	55.1652
rs9688218	T	C	0.0268006	0.00315916	2.19989e-17	0.112737	71.9691
rs78474539	G	T	0.014383	0.00205009	2.29985e-12	0.615329	49.2213
rs79307036	T	C	-0.0143482	0.00208059	5.30029e-12	0.350949	47.5578
rs77977678	T	G	-0.0139498	0.00207296	1.69981e-11	0.356561	45.285
rs79272242	C	T	-0.0140266	0.00207292	1.29987e-11	0.356568	45.7867
rs13162702	G	A	-0.0145732	0.00202974	7.00003e-13	0.394062	51.55
rs137974590	T	C	0.0141088	0.00207635	1.10002e-11	0.645676	46.172
rs78417438	T	G	0.01418	0.0020128	1.9002e-12	0.567251	49.6308
rs6868618	A	G	-0.0139613	0.00224025	4.60002e-10	0.270746	38.8382
rs3105790	G	T	0.0146942	0.00218783	1.9002e-11	0.706025	45.1092
rs1363099	C	T	-0.0117435	0.00204042	8.60003e-09	0.602889	33.125
rs115714888	A	G	-0.0324649	0.00534918	1.29999e-09	0.962419	36.8344
rs77080152	T	A	-0.0162325	0.00283929	1.09999e-08	0.142939	32.6852
rs112679644	C	T	-0.0170081	0.00264989	1.40001e-10	0.169169	41.1961
rs113655114	A	G	-0.0205807	0.00231145	5.40008e-19	0.25122	79.2777
rs142185317	G	A	-0.0195029	0.0022773	1.10002e-17	0.256451	73.3429
rs147351017	A	G	-0.0194576	0.00234183	9.70063e-17	0.236317	69.0348
rs32382	G	T	0.0175188	0.00309589	1.5e-08	0.117143	32.0212
rs4704727	T	G	0.0328769	0.00206427	4.10015e-57	0.635869	253.658
rs10053557	T	C	0.024189	0.00205789	6.70039e-32	0.373503	138.163
rs144568696	G	A	-0.0144159	0.0023623	1e-09	0.771207	37.2403
rs76582114	A	G	-0.0145987	0.00236509	6.69993e-10	0.771831	38.1007
rs28403207	G	T	0.0145417	0.00236698	8.10009e-10	0.228526	37.7434
rs145197517	G	C	-0.0236064	0.00308401	1.9002e-14	0.117168	58.5906
rs9500866	C	T	-0.0259864	0.00280415	1.9002e-20	0.146189	85.8795
rs9394047	A	C	0.026685	0.00207454	7.29962e-38	0.649881	165.459
rs2856683	T	G	-0.0394482	0.00280839	8.10028e-45	0.14576	197.306
rs116745041	G	A	-0.0273746	0.00347536	3.40017e-15	0.089468	62.0435
rs6906517	C	T	0.0451321	0.00719623	3.59998e-10	0.019492	39.3334
rs115588779	A	G	0.0338063	0.00579666	5.49997e-09	0.030332	34.0126
rs112496462	G	A	0.0388192	0.00471107	1.69981e-16	0.046578	67.8975
rs1281956	C	T	-0.0113115	0.00198865	1.29999e-08	0.53058	32.3537
rs73256056	A	C	0.0176494	0.00303718	6.19998e-09	0.122052	33.769
rs66578379	T	G	0.0140683	0.00241363	5.60003e-09	0.254842	33.9736
rs810548	G	A	-0.0698354	0.00878849	1.9002e-15	0.016691	63.1426
rs573020	C	G	-0.0403215	0.00610205	3.90032e-11	0.031233	43.6638
rs112392393	C	T	-0.010899	0.00198687	4.09996e-08	0.527557	30.0908
rs13263047	G	A	-0.011116	0.00200722	3.09999e-08	0.539288	30.6695
rs6472589	A	G	0.0344962	0.00367235	5.79963e-21	0.078758	88.2377
rs74650166	C	T	-0.0319576	0.00372771	1e-17	0.922328	73.4961
rs2721946	G	T	0.013379	0.00220403	1.29999e-09	0.720464	36.8479
rs62510553	A	G	-0.0143308	0.00213889	2.09991e-11	0.312025	44.8915
rs71518751	C	T	-0.0143371	0.00247351	6.80002e-09	0.200865	33.5966
rs3935374	C	T	-0.0114809	0.00204225	1.89998e-08	0.609693	31.6034
rs62541875	A	G	-0.0115014	0.0020362	1.6e-08	0.610665	31.9051
rs10738463	G	A	-0.0138131	0.00237197	5.80003e-09	0.739049	33.9128
rs117902958	G	A	0.0157943	0.00254439	5.39995e-10	0.809668	38.5331
rs117148840	T	C	-0.0157717	0.00253594	5e-10	0.190174	38.6793
rs151042416	G	A	-0.0159212	0.00254044	3.69999e-10	0.189216	39.2766
rs72746870	G	A	-0.0159418	0.0025478	3.89996e-10	0.188782	39.1511
rs77032392	T	C	0.0125642	0.00203295	6.4e-10	0.603848	38.1959
rs139404317	A	G	-0.0188612	0.00227722	1.20005e-16	0.257226	68.6007
rs140277194	C	T	-0.0189692	0.00227924	8.60003e-17	0.255926	69.2657
rs139630739	G	T	-0.0191374	0.00227899	4.60045e-17	0.255862	70.5149
rs112639576	T	C	-0.0193209	0.00241771	1.29987e-15	0.216221	63.8626
rs113639948	T	A	-0.0202838	0.00228763	7.50067e-19	0.252926	78.6189
rs167202	T	C	0.0196473	0.00227679	6.20012e-18	0.743332	74.4663
rs8176733	T	C	-0.021158	0.00256189	1.50003e-16	0.184548	68.2069
rs36220584	C	T	0.0168499	0.00289236	5.69994e-09	0.863435	33.9383
rs137855938	A	G	0.0169589	0.00291073	5.69994e-09	0.864944	33.9462
rs17381591	T	C	0.0111232	0.00201767	3.50002e-08	0.417724	30.392
rs75743427	T	C	-0.0282039	0.00405417	3.50026e-12	0.064335	48.3966
rs7919055	T	C	0.0132444	0.00201948	5.40008e-11	0.578299	43.0116
rs79704308	T	C	-0.0201502	0.00334298	1.7e-09	0.098804	36.3322
rs80050293	G	C	-0.0178912	0.0030625	5.19996e-09	0.878942	34.1293
rs74355892	G	A	-0.0204318	0.00349436	5e-09	0.909614	34.1883
rs117268768	A	G	0.02028	0.00342473	3.2e-09	0.093342	35.0658
rs10509358	G	A	-0.0203461	0.00341926	2.69998e-09	0.902421	35.4077
rs142751408	T	G	0.0201538	0.00343502	4.39997e-09	0.093422	34.4235
rs2862952	G	A	0.0108284	0.00198508	4.90004e-08	0.496332	29.7559
rs4752513	A	G	-0.0112803	0.00199958	1.7e-08	0.54463	31.8247
rs118087052	C	T	-0.0117384	0.00212648	3.40001e-08	0.675318	30.4716
rs528531	T	C	-0.0117912	0.00208902	1.7e-08	0.65807	31.8589
rs34089625	C	T	0.017936	0.00309381	6.69993e-09	0.116953	33.6096
rs34177110	G	A	0.0174808	0.00286221	1e-09	0.139651	37.3009
rs143756483	C	T	-0.0153408	0.00278323	3.59998e-08	0.851452	30.3807
rs10791995	A	G	0.030291	0.00400139	3.69999e-14	0.065567	57.3067
rs76797093	C	T	0.0140654	0.00221793	2.30001e-10	0.281168	40.2169
rs118025462	G	A	0.0153363	0.00226134	1.20005e-11	0.619665	45.9949
rs142335922	C	T	0.0136606	0.00218083	3.79997e-10	0.299496	39.237
rs117568071	C	T	0.0267037	0.00217144	9.30037e-35	0.352228	151.233
rs11216055	C	T	0.116292	0.00330014	1e-200	0.103783	1241.75
rs530849	T	C	0.172625	0.00464602	1e-200	0.048067	1380.53
rs141414463	C	T	0.28257	0.0105243	8.59014e-159	0.009494	720.884
rs139447106	C	T	0.121489	0.00335016	1e-200	0.097847	1315.05
rs144018203	G	C	-0.0373109	0.00347829	7.59976e-27	0.089335	115.064
rs145333465	A	G	0.0569005	0.00266571	4.29536e-101	0.170133	455.624
rs73008535	C	T	-0.0432372	0.00425327	2.80027e-24	0.057775	103.34
rs76604460	A	G	0.012651	0.00204973	6.69993e-10	0.397494	38.094
rs192448	A	G	-0.025017	0.00251023	2.09991e-23	0.197457	99.3215
rs61926180	T	G	0.0275604	0.00276834	2.39994e-23	0.151606	99.1134
rs2291074	A	G	0.0273673	0.00277608	6.29941e-23	0.151506	97.1852
rs150897358	C	G	0.0239083	0.00272099	1.50003e-18	0.158971	77.2047
rs11832927	C	T	-0.0121338	0.00221197	4.09996e-08	0.293196	30.0909
rs12829453	G	A	-0.0146316	0.00231244	2.5e-10	0.755165	40.0353
rs56161636	G	A	-0.0121079	0.00220289	3.89996e-08	0.28613	30.2101
rs35032945	A	C	-0.0281414	0.00232488	1e-33	0.23908	146.518
rs11174378	G	T	-0.0203641	0.00323529	3.09999e-10	0.106343	39.619
rs150118637	T	C	-0.019965	0.00333844	2.19999e-09	0.100515	35.7644
rs10878344	G	A	0.0131815	0.00198765	3.29989e-11	0.494177	43.9795
rs76332981	T	C	-0.0119649	0.0020938	1.09999e-08	0.655737	32.6549
rs76912268	C	T	0.0138736	0.00203396	8.99912e-12	0.599237	46.5258
rs77148471	T	C	0.0150379	0.00228647	4.79954e-11	0.742113	43.2557
rs113067784	C	T	0.0125024	0.00219982	1.29999e-08	0.712026	32.3007
rs72722002	C	T	0.0125058	0.00222578	1.89998e-08	0.724953	31.5688
rs116984490	A	G	-0.0129897	0.00215234	1.6e-09	0.309898	36.4231
rs61990420	A	G	-0.0124432	0.00223152	2.5e-08	0.273293	31.093
rs8029871	G	T	-0.0227824	0.00251212	1.20005e-19	0.804186	82.2466
rs181902229	C	T	-0.0190197	0.00237427	1.10002e-15	0.77109	64.1722
rs116963079	T	G	-0.0233642	0.00254016	3.59998e-20	0.809174	84.6018
rs78900262	G	A	0.0196092	0.00340711	8.60003e-09	0.0952	33.1244
rs289807	C	T	-0.0126566	0.00199237	2.1e-10	0.523376	40.3547
rs4984246	G	T	0.0240057	0.00209653	2.29985e-30	0.343192	131.107
rs189340488	C	T	-0.0135118	0.0023844	1.5e-08	0.226664	32.1121
rs139955686	C	T	0.0118171	0.00201611	4.60002e-09	0.431467	34.3553
rs118103729	C	T	-0.0134814	0.00204781	4.60045e-11	0.388624	43.3402
rs3784514	G	C	-0.0133199	0.00204845	7.89951e-11	0.388195	42.2816
rs6598485	T	C	0.0171661	0.00228551	5.90065e-14	0.257031	56.4127
rs150762228	G	A	0.0403999	0.00735364	3.89996e-08	0.018647	30.1825
rs13339206	G	T	-0.0145418	0.0020519	1.39991e-12	0.376379	50.2255
rs72759463	C	T	-0.0133147	0.00205662	9.49948e-11	0.373492	41.9136
rs11641637	G	A	-0.0132909	0.0020562	1e-10	0.37359	41.7809
rs8062823	C	T	-0.0159573	0.0023962	2.70023e-11	0.285031	44.3479
rs118092382	G	T	-0.0144791	0.00228823	2.5e-10	0.255833	40.0391
rs370188553	G	A	0.0261565	0.00217757	3.10027e-33	0.295999	144.283
rs13329844	G	A	0.0188187	0.00202597	1.59993e-20	0.588383	86.2806
rs147254395	G	A	0.0184036	0.00277779	3.50026e-11	0.152453	43.8942
rs2081223	A	C	0.0278816	0.00253733	4.30031e-28	0.189994	120.748
rs113508418	G	A	-0.0987846	0.0128772	1.69981e-14	0.006953	58.8485
rs2053595	G	A	-0.111639	0.0134778	1.20005e-16	0.006551	68.611
rs4796309	T	C	0.0146581	0.00239559	9.40005e-10	0.221978	37.4395
rs118085031	C	T	-0.0696892	0.0110329	2.69998e-10	0.00966	39.898
rs17690038	A	G	-0.0659004	0.00581099	8.30042e-30	0.030383	128.61
rs77205434	C	T	0.0127374	0.00226641	1.89998e-08	0.737964	31.5853
rs141570304	T	C	-0.0127358	0.00225958	1.7e-08	0.264231	31.7685
rs138239187	C	T	-0.0228203	0.00384909	3.09999e-09	0.072004	35.1501
rs142874203	A	C	0.0146292	0.00224967	7.89951e-11	0.268644	42.2867
rs11152211	A	G	0.0156371	0.00225785	4.30031e-12	0.265721	47.9648
rs7238234	G	A	0.0154711	0.00224766	5.90065e-12	0.269117	47.3785
rs681118	A	G	0.0155543	0.00225443	5.19996e-12	0.265614	47.6022
rs6122213	T	G	0.0113547	0.00206	3.50002e-08	0.392157	30.382
rs816931	A	G	-0.0163778	0.00199681	2.39994e-16	0.489576	67.2725
rs117421055	G	A	0.0113727	0.00200642	1.40001e-08	0.483705	32.128
rs55931418	C	G	0.0136536	0.00205271	2.90001e-11	0.427674	44.2424

## Sheet: Supplementary Table 7
Supplementary Table 7. Genetic variants that were used as instruments for TG in Finn
SNP	Effect Allele	other allele	Beta	SE	P value	Effect Allele Frequency	F
rs6605083	T	C	0.234	0.0114487	0.00169732	1.53e-11	417.753
rs12743493	G	A	0.375	-0.00866494	0.00152129	1.23e-08	1872.97
rs7538833	C	T	0.376	-0.0109131	0.00145369	6.04e-14	1187.08
rs213641	A	C	0.404	-0.00955255	0.00145537	5.25e-11	1788.64
rs114165349	G	C	0.0226	0.0673231	0.00476926	3.02e-45	0.112691
rs4660690	G	A	0.216	0.0210177	0.00170792	8.41e-35	105.618
rs36090360	A	G	0.188	0.0104663	0.00182807	1.03e-08	322.648
rs11205766	T	A	0.0937	-0.0217239	0.00244151	5.7e-19	18.6039
rs1883783	G	T	0.422	-0.0140345	0.00143228	1.14e-22	904.13
rs74328314	A	G	0.0723	-0.0202075	0.00275593	2.26e-13	12.8012
rs624698	A	G	0.41	-0.0633671	0.00164837	1e-200	41.8639
rs2613505	T	C	0.192	-0.0139033	0.00180557	1.36e-14	190.707
rs165026	G	C	0.356	-0.00853749	0.00148025	8.04e-09	1738.76
rs12133907	A	C	0.392	-0.0119966	0.0014533	1.52e-16	1067.72
rs4378243	T	G	0.172	0.0144731	0.00188647	1.69e-14	141.232
rs61780266	A	G	0.167	-0.0105002	0.00189322	2.92e-08	252.952
rs646776	T	C	0.22	-0.0116653	0.00168372	4.26e-12	355.675
rs488815	A	G	0.314	0.0086615	0.00152375	1.31e-08	1314.24
rs197374	C	T	0.384	0.00788768	0.00144283	4.58e-08	2370.08
rs2273368	C	T	0.194	-0.0098936	0.00178097	2.77e-08	384.499
rs10494363	G	A	0.0756	-0.0262651	0.00265675	4.78e-23	8.28487
rs12750321	A	G	0.288	-0.0148382	0.0015706	3.47e-21	376.723
rs11589479	G	A	0.158	-0.0115097	0.00192432	2.22e-09	188.446
rs235861	A	G	0.298	0.00920396	0.00153814	2.18e-09	1048.29
rs7539464	A	T	0.429	0.0129014	0.00142347	1.27e-19	1105.71
rs75221896	G	A	0.0594	-0.01667	0.00298967	2.46e-08	12.697
rs115276619	T	A	0.0157	-0.0492074	0.00582939	3.14e-17	0.101798
rs12069549	C	T	0.125	0.012154	0.00212334	1.04e-08	105.775
rs2821228	G	C	0.462	0.0132609	0.0014998	9.42e-19	1213.77
rs11240358	G	A	0.399	0.0133333	0.00144147	2.25e-20	895.51
rs12023563	G	A	0.295	-0.0103117	0.00155422	3.25e-11	818.434
rs1415293	A	T	0.314	-0.0203156	0.00151622	6.14e-41	238.891
rs903319	T	C	0.263	-0.0141751	0.00159877	7.56e-19	344.238
rs6690181	T	C	0.386	-0.00950399	0.00163732	6.45e-09	1649.54
rs2281721	T	C	0.388	0.0433901	0.00143504	1e-200	79.9617
rs1043897	G	T	0.414	-0.014894	0.0014338	2.82e-25	772.641
rs17713879	G	A	0.368	-0.0111673	0.00146348	2.34e-14	1085.92
rs3820897	C	T	0.185	-0.0162569	0.00181727	3.69e-19	129.499
rs78980904	T	C	0.231	-0.0600289	0.00169962	1e-200	14.8082
rs62130519	C	T	0.0657	0.0168263	0.00290957	7.33e-09	15.2459
rs115661421	A	G	0.00875	0.0725196	0.00779361	1.34e-20	0.0145581
rs75291407	C	T	0.033	-0.0323646	0.0040154	7.62e-16	1.03965
rs4665378	A	C	0.401	-0.0575182	0.00143795	1e-200	48.6047
rs77644716	G	C	0.093	-0.0489552	0.00247171	2.63e-87	3.60885
rs72616903	T	C	0.162	0.0157271	0.00192811	3.44e-16	106.104
rs4245791	T	C	0.314	0.0098327	0.00151658	8.96e-11	1019.8
rs687914	G	T	0.246	0.00995038	0.00167229	2.68e-09	611.211
rs144203988	G	A	0.235	-0.00939358	0.00166462	1.67e-08	625.855
rs4671328	G	T	0.452	0.0107717	0.00142921	4.82e-14	1760.79
rs4671331	C	T	0.392	0.00931504	0.00143834	9.4e-11	1770.94
rs6546096	G	A	0.261	-0.00902146	0.00161983	2.56e-08	837.004
rs2540949	A	T	0.385	-0.0195024	0.00144651	1.99e-41	389.713
rs6749911	G	A	0.124	0.0122825	0.00212177	7.09e-09	101.922
rs72946301	G	A	0.0986	-0.0200743	0.00239461	5.15e-17	24.1253
rs7578604	G	T	0.251	0.0167539	0.00162837	7.92e-25	224.448
rs6430090	G	A	0.403	0.00987671	0.00144211	7.45e-12	1664.89
rs35164012	G	T	0.0812	-0.0144405	0.00255199	1.53e-08	31.619
rs11901391	T	C	0.184	-0.0122575	0.00182942	2.08e-11	225.337
rs72623112	G	A	0.135	0.0120613	0.00213011	1.49e-08	125.279
rs13389219	C	T	0.403	-0.03374	0.00142882	2.77e-123	142.666
rs532779	T	A	0.296	-0.00940268	0.0015788	2.59e-09	991.015
rs1420384	T	G	0.329	0.0100494	0.00150047	2.12e-11	1071.79
rs16867014	T	C	0.305	-0.00980907	0.00153783	1.79e-10	966.816
rs2110690	A	G	0.491	0.00934486	0.00140501	2.91e-11	2760.69
rs148566631	G	A	0.117	0.017592	0.0021901	9.55e-16	44.2325
rs1263673	G	A	0.4	0.00814955	0.00146085	2.42e-08	2409.09
rs3731860	G	A	0.404	0.00860359	0.00143969	2.29e-09	2204.97
rs78058190	G	A	0.0514	0.0755549	0.00371754	7.9e-92	0.462808
rs1024137	T	G	0.363	-0.0344371	0.00145697	1.64e-123	111.112
rs57074291	C	G	0.265	-0.0110893	0.00159338	3.41e-12	571.062
rs79639690	T	C	0.0469	0.0232823	0.00336509	4.56e-12	4.05783
rs35203651	T	C	0.106	0.0133459	0.00228128	4.91e-09	63.0835
rs4078407	T	C	0.437	0.00814731	0.00144811	1.84e-08	2876.96
rs4675812	A	G	0.411	0.00867953	0.00143111	1.32e-09	2242.29
rs9812100	G	A	0.474	-0.0125347	0.00141162	6.71e-19	1429.98
rs62246311	G	A	0.103	0.0157393	0.00229731	7.32e-12	42.8256
rs12488497	A	G	0.13	0.0178318	0.00208648	1.27e-17	53.1492
rs1801282	C	G	0.123	-0.0267011	0.00212644	3.65e-36	21.2203
rs9849171	G	C	0.357	-0.0120902	0.0014622	1.36e-16	871.906
rs2044755	T	A	0.122	0.0136083	0.00214614	2.29e-10	80.3733
rs6792725	G	A	0.312	0.0164114	0.00159534	8.06e-25	361.425
rs4678556	C	G	0.45	-0.0107924	0.00143122	4.67e-14	1738.56
rs4955411	G	A	0.225	-0.0136677	0.00168323	4.66e-16	271.003
rs17052061	T	G	0.172	-0.0196478	0.00185891	4.13e-26	76.6353
rs6777887	G	A	0.172	-0.0110405	0.00189772	5.96e-09	242.705
rs12486424	A	C	0.284	0.0119263	0.00156102	2.17e-14	567.055
rs62251038	A	G	0.429	0.00801189	0.00142694	1.97e-08	2867.11
rs13066793	A	G	0.0918	-0.0181108	0.00248847	3.39e-13	25.6927
rs10934286	A	G	0.103	0.0126208	0.00228974	3.55e-08	66.6041
rs6795831	A	C	0.195	-0.0110953	0.0017932	6.12e-10	308.881
rs684773	C	A	0.212	-0.0247602	0.00178503	9.49e-44	73.31
rs12638256	G	A	0.468	0.0118657	0.00140609	3.21e-17	1555.63
rs389761	C	T	0.271	0.0122443	0.00158	9.22e-15	489.859
rs9817452	G	T	0.386	-0.0182186	0.00146264	1.3e-35	448.895
rs10513688	G	A	0.0981	0.0211167	0.00233421	1.47e-19	21.5817
rs79287178	G	A	0.0288	0.0605211	0.00438198	2.18e-43	0.226449
rs6773982	T	A	0.0577	0.0187852	0.00298951	3.31e-10	9.43452
rs2194411	G	A	0.129	-0.0121031	0.00213512	1.44e-08	113.602
rs7612450	G	A	0.365	0.00891631	0.00146056	1.03e-09	1675.77
rs35220088	G	C	0.399	0.00899162	0.0014683	9.14e-10	1969.11
rs13108218	G	A	0.389	0.0283765	0.00148435	1.82e-81	187.924
rs71603401	A	G	0.13	0.0210471	0.00210557	1.59e-23	38.1507
rs73243877	A	G	0.164	0.0216734	0.00188377	1.24e-30	57.2577
rs3109841	T	G	0.334	0.00875607	0.00150064	5.38e-09	1455.04
rs2159935	G	A	0.483	-0.00919894	0.00140662	6.16e-11	2756.89
rs9884390	T	C	0.223	0.0170606	0.0017599	3.2e-22	170.852
rs62298399	T	A	0.297	0.00938587	0.00170443	3.66e-08	1001.3
rs12513202	T	C	0.393	-0.00825146	0.001472	2.08e-08	2268.42
rs10033843	G	A	0.211	0.00976613	0.0017136	1.2e-08	466.788
rs10008637	T	C	0.457	0.0104077	0.00140874	1.49e-13	1928.07
rs17605615	G	A	0.394	0.0272226	0.00144291	2.15e-79	209.476
rs13118477	G	A	0.393	0.0102631	0.00145727	1.89e-12	1466.32
rs1126673	T	C	0.306	-0.0138797	0.00152348	8.2e-20	486.052
rs13107325	C	T	0.0665	0.0372288	0.00277378	4.51e-41	3.19069
rs148827772	A	G	0.021	0.0414014	0.00543967	2.72e-14	0.257281
rs72679249	A	G	0.318	0.0112403	0.0015667	7.26e-13	800.384
rs4391043	A	T	0.225	0.0109258	0.00170082	1.33e-10	424.09
rs10030238	A	G	0.407	-0.00876511	0.00143094	9.04e-10	2156.13
rs7696969	G	T	0.372	0.0120304	0.00145659	1.47e-16	956.149
rs72969958	G	T	0.00923	0.0522428	0.00775116	1.58e-11	0.0312141
rs4691378	A	G	0.325	-0.0144158	0.00149616	5.68e-22	508.264
rs79760705	G	T	0.109	0.0261664	0.00224684	2.41e-31	17.3526
rs3936511	A	G	0.182	0.0389045	0.0018078	1e-102	21.8848
rs832540	A	G	0.359	0.012347	0.00147255	5.08e-17	845.407
rs151912	T	A	0.406	0.0113438	0.00145278	5.79e-15	1280.96
rs10939903	C	T	0.489	-0.00784673	0.00141584	2.99e-08	3883.65
rs4976033	A	G	0.407	0.0180396	0.0014541	2.42e-35	509.02
rs115912456	A	G	0.0434	-0.0271939	0.00344256	2.8e-15	2.54704
rs7708715	C	A	0.47	-0.00878313	0.00140773	4.4e-10	2863.5
rs4916697	A	T	0.341	-0.00830619	0.00147934	1.97e-08	1685.41
rs172305	G	A	0.305	-0.00951019	0.00152273	4.22e-10	1028.54
rs33554	C	G	0.494	-0.00883688	0.00141506	4.24e-10	3125.04
rs6595187	A	G	0.282	-0.0195709	0.00156782	9.26e-36	207.624
rs253942	C	T	0.0595	0.0247801	0.00296424	6.29e-17	5.76538
rs72801474	G	A	0.0974	-0.0301227	0.00242251	1.7e-35	10.4551
rs2302104	C	T	0.239	-0.0113907	0.00165032	5.12e-12	440.246
rs6863979	A	G	0.338	-0.00898097	0.0014974	2e-09	1416.4
rs245056	T	A	0.396	-0.00924122	0.00145718	2.27e-10	1836.25
rs6882076	C	T	0.366	-0.0341614	0.00145299	3.14e-122	114.787
rs10076475	A	G	0.43	-0.00840764	0.00142637	3.76e-09	2615.7
rs2963431	C	T	0.237	0.0172861	0.00165421	1.47e-25	187.976
rs72812818	G	C	0.305	0.0107102	0.00151879	1.77e-12	810.969
rs12652509	G	A	0.24	0.0132115	0.00165298	1.32e-15	330.003
rs75479205	A	G	0.19	-0.0117785	0.00181063	7.76e-11	260.212
rs6924805	T	G	0.41	0.00985428	0.00143475	6.5e-12	1731.08
rs6938091	A	G	0.209	-0.0130478	0.00173561	5.57e-14	256.577
rs6900444	C	T	0.497	0.0266625	0.00145121	2.18e-75	347.465
rs28848172	G	T	0.0448	0.0850159	0.00401169	1.13e-99	0.277687
rs1705001	G	A	0.233	-0.0115011	0.00173922	3.77e-11	410.424
rs9471959	A	G	0.307	0.00959014	0.00152756	3.43e-10	1024.77
rs998584	C	A	0.479	0.03643	0.00144509	3.15e-140	172.883
rs36184164	T	G	0.113	0.0149481	0.0022676	4.34e-11	57.1459
rs2396083	C	G	0.307	-0.0183313	0.00154522	1.84e-32	280.472
rs73744635	T	C	0.0486	-0.0190726	0.00333281	1.05e-08	6.49311
rs9450316	C	T	0.391	0.0120242	0.00156368	1.48e-14	1057.4
rs9496567	G	A	0.238	-0.01233	0.00166069	1.13e-13	372.587
rs35729812	A	G	0.494	0.00870011	0.00140873	6.58e-10	3224.07
rs35045014	C	A	0.463	0.0135786	0.00145968	1.37e-20	1162.66
rs1260752	C	T	0.188	0.0131563	0.00184035	8.75e-13	204.196
rs354532	T	C	0.464	-0.00870909	0.0014189	8.36e-10	2838.51
rs9401908	A	G	0.439	-0.0164165	0.00143278	2.15e-30	715.102
rs577721086	T	C	0.0518	0.0531898	0.00325156	3.8e-60	0.948425
rs672457	A	G	0.415	0.0265788	0.00142059	4.13e-78	243.795
rs9321765	T	C	0.208	-0.012555	0.00174618	6.48e-13	274.469
rs112201728	C	T	0.0693	0.0419663	0.00272888	2.28e-53	2.72687
rs9295128	G	T	0.0143	-0.0414719	0.00601028	5.19e-12	0.118895
rs41272086	G	A	0.102	0.0382309	0.00233072	1.82e-60	7.11822
rs6925800	C	T	0.0412	-0.0230122	0.00364127	2.62e-10	3.20537
rs4709746	C	T	0.134	-0.0185257	0.00208629	6.7e-19	52.3191
rs56208327	G	C	0.0324	-0.0253283	0.00433527	5.15e-09	1.63636
rs852424	C	T	0.335	0.00951884	0.00150098	2.27e-10	1238.57
rs5011434	C	T	0.413	0.00946464	0.00142153	2.77e-11	1904.11
rs38205	C	A	0.377	0.0125434	0.001471	1.5e-17	903.342
rs4410790	C	T	0.37	-0.0137766	0.00145082	2.19e-21	721.306
rs4142995	G	T	0.396	0.0126511	0.001437	1.32e-18	979.792
rs4722551	T	C	0.16	-0.0277134	0.00190326	4.97e-48	33.3319
rs1406754	G	T	0.403	-0.0158502	0.00145856	1.66e-27	646.458
rs849336	G	A	0.351	0.00989039	0.00147066	1.75e-11	1259.47
rs2070971	G	T	0.138	0.0282153	0.00205096	4.62e-43	23.9215
rs2971669	C	T	0.211	0.0109028	0.0017251	2.61e-10	374.532
rs11765031	C	T	0.407	-0.00991897	0.00151514	5.89e-11	1683.66
rs42132	C	T	0.178	-0.0612804	0.00194324	1e-200	8.43717
rs10275549	T	A	0.184	0.0391958	0.00190098	1.86e-94	22.0372
rs149615831	T	C	0.337	0.0232974	0.00153104	2.74e-52	209.24
rs1057868	C	T	0.282	0.0118114	0.00155412	2.96e-14	570.027
rs4272	A	G	0.21	-0.00941314	0.00171753	4.24e-08	497.702
rs66905828	A	C	0.301	-0.00939498	0.00153709	9.83e-10	1026.46
rs2253833	C	T	0.231	-0.0109959	0.00169815	9.47e-11	441.329
rs10215153	G	A	0.312	0.0121189	0.00152606	2e-15	662.8
rs12534129	T	C	0.389	0.0122559	0.00145016	2.88e-17	1007.42
rs4731702	C	T	0.497	-0.0249458	0.00139841	3.54e-71	396.934
rs855918	G	A	0.372	0.00879184	0.00147723	2.66e-09	1790.3
rs7808446	G	T	0.242	0.0159935	0.00165093	3.41e-22	228.952
rs73165514	G	A	0.092	0.016748	0.00240553	3.35e-12	30.1752
rs752446	G	A	0.376	0.0227068	0.00146137	1.92e-54	274.198
rs2686189	T	C	0.333	0.0167987	0.00150678	7.26e-29	392.95
rs7465360	T	C	0.151	-0.0121349	0.00197135	7.48e-10	154.839
rs2934	A	C	0.468	-0.0175462	0.00142996	1.31e-34	711.419
rs11986182	A	T	0.167	-0.0682125	0.0019026	1e-200	5.99384
rs1801177	G	A	0.0159	0.167452	0.00555518	1.31e-199	0.00901599
rs148754782	G	A	0.0298	-0.0616052	0.00418751	5.43e-49	0.23399
rs7816345	C	T	0.17	0.0135937	0.00184963	1.99e-13	156.395
rs3213849	G	A	0.402	0.0123559	0.00143933	9.12e-18	1058.53
rs9297994	A	G	0.336	0.0231174	0.00148603	1.44e-54	211.252
rs615031	A	T	0.371	0.00841751	0.00145956	8.06e-09	1942.59
rs4737301	A	G	0.232	0.00955643	0.00167382	1.13e-08	589.365
rs13269725	A	G	0.075	0.0275648	0.00266541	4.56e-25	7.40309
rs16909233	G	A	0.159	-0.0128249	0.00195877	5.85e-11	153.704
rs7830852	A	G	0.223	0.0115705	0.00169262	8.15e-12	371.454
rs808982	G	T	0.241	-0.0119714	0.00163739	2.65e-13	405.27
rs4300038	G	A	0.311	-0.00908392	0.00155086	4.7e-09	1172.13
rs2385114	C	T	0.489	0.0495458	0.00146252	1e-200	97.4101
rs16903058	C	T	0.119	-0.0136621	0.00216277	2.67e-10	75.8681
rs7832515	A	G	0.196	-0.0144455	0.00180899	1.4e-15	184.097
rs7856817	G	A	0.173	0.0143634	0.00186004	1.14e-14	145.07
rs35769682	A	G	0.184	-0.0110768	0.00180829	9.04e-10	275.935
rs12683162	G	C	0.173	0.011981	0.00188124	1.91e-10	208.5
rs7041117	T	A	0.418	0.0106217	0.00142709	9.85e-14	1548.69
rs686030	A	C	0.142	-0.0164792	0.00200393	1.98e-16	74.2514
rs62543565	A	C	0.36	0.0158343	0.00146831	4.1e-27	516.901
rs3205166	T	G	0.359	-0.0082334	0.00148738	3.1e-08	1901.21
rs10971957	T	C	0.403	0.0110783	0.00145184	2.34e-14	1323.32
rs1571953	T	C	0.22	-0.0114709	0.0016923	1.22e-11	367.833
rs10868080	A	T	0.263	-0.0118779	0.00159751	1.04e-13	490.266
rs17055001	G	A	0.311	0.0125358	0.00152381	1.93e-16	615.484
rs2181584	G	C	0.17	0.0110511	0.00186718	3.25e-09	236.639
rs10118003	T	C	0.443	-0.00875306	0.00142007	7.1e-10	2561.46
rs1800978	C	G	0.123	-0.0256249	0.00216098	1.96e-32	23.0402
rs137967290	G	A	0.0179	0.0305318	0.00549489	2.75e-08	0.343717
rs12347784	T	G	0.1	0.0130079	0.00236957	4.03e-08	59.0997
rs11789974	C	A	0.0319	-0.0312125	0.00406149	1.53e-14	1.04454
rs116994374	G	A	0.071	-0.0184285	0.00285343	1.06e-10	14.8435
rs2416797	A	C	0.303	-0.0115915	0.00153494	4.29e-14	683.291
rs4838074	C	T	0.289	0.0104554	0.00155326	1.68e-11	764.037
rs13295248	T	C	0.271	0.0104317	0.00160648	8.39e-11	674.883
rs140107293	A	G	0.156	-0.0211348	0.00194084	1.29e-27	54.482
rs263423	G	A	0.202	-0.0101922	0.00177384	9.15e-09	392.796
rs165529	G	A	0.226	0.0108383	0.00181122	2.18e-09	434.805
rs10763928	C	T	0.0914	0.0184127	0.00245514	6.4e-14	24.6409
rs7070395	A	C	0.215	0.0107384	0.0017166	3.96e-10	400.865
rs10827614	C	A	0.388	0.00909356	0.00145797	4.46e-10	1820.52
rs71508062	G	A	0.0203	0.0332684	0.00511058	7.53e-11	0.37233
rs72815843	G	A	0.203	-0.0137256	0.00175827	5.89e-15	218.741
rs116853320	A	G	0.0318	0.0234374	0.003971	3.59e-09	1.84092
rs55830835	G	A	0.0998	-0.0169304	0.00235405	6.38e-13	34.7477
rs7924036	T	G	0.487	0.0292474	0.00142399	9.64e-94	277.258
rs7904738	G	C	0.0875	0.0228766	0.00250844	7.52e-20	14.6296
rs10882018	T	C	0.307	0.00957285	0.00164249	5.6e-09	1028.48
rs2068888	G	A	0.451	-0.0292118	0.00141361	7.2e-95	238.362
rs10786114	T	C	0.123	0.0179893	0.00214623	5.21e-17	46.75
rs75398587	C	G	0.063	-0.0273737	0.00288186	2.13e-21	5.29681
rs2803619	C	G	0.28	-0.0173897	0.00155378	4.47e-29	259.258
rs56397607	A	G	0.182	0.0157944	0.00183084	6.31e-18	132.781
rs4918784	G	A	0.253	-0.00920569	0.00167056	3.58e-08	755.315
rs2484294	A	G	0.264	0.0107802	0.00158992	1.2e-11	599.728
rs12772930	G	A	0.353	0.0105695	0.00147595	8e-13	1115.43
rs1873446	T	C	0.0206	-0.0333992	0.00531779	3.37e-10	0.380419
rs1133400	A	G	0.215	0.0137293	0.00172628	1.82e-15	245.234
rs567130968	C	A	0.0265	0.0374286	0.00534224	2.45e-12	0.501285
rs117291242	C	T	0.0347	0.0257056	0.00397982	1.05e-10	1.82223
rs4909945	C	T	0.32	-0.0131937	0.00149801	1.28e-18	588.257
rs6486122	T	C	0.313	-0.0185356	0.00151208	1.52e-34	285.151
rs61885960	T	A	0.0522	-0.028403	0.00337088	3.58e-17	3.37763
rs72859846	A	G	0.0394	-0.0212094	0.00379585	2.3e-08	3.45093
rs11029441	T	C	0.0858	0.0178554	0.00257836	4.36e-12	23.0906
rs1519480	T	C	0.32	0.0151223	0.00150192	7.6e-24	447.78
rs10835634	A	C	0.363	-0.00970742	0.00149199	7.7e-11	1398.32
rs62618693	C	T	0.0426	-0.0217735	0.00349453	4.64e-10	3.82792
rs10838681	G	A	0.269	-0.0240596	0.00159385	1.74e-51	125.005
rs118188894	T	C	0.0986	0.0157858	0.00237546	3.02e-11	39.014
rs174528	T	C	0.374	0.0484418	0.00146664	1e-200	59.6077
rs10750766	A	C	0.291	-0.0170058	0.00155499	7.73e-28	292.814
rs508049	C	T	0.0567	0.0219965	0.0031724	4.1e-12	6.64445
rs7951796	G	A	0.414	0.00834028	0.00149235	2.29e-08	2463.99
rs570456	C	T	0.253	0.00902884	0.00163488	3.34e-08	785.194
rs2063724	T	C	0.169	-0.0145709	0.00189381	1.43e-14	134.524
rs10765572	T	C	0.283	0.00951204	0.00154925	8.26e-10	885.168
rs11021305	T	C	0.383	-0.00839968	0.00144985	6.89e-09	2079.08
rs495033	T	C	0.0708	0.0324973	0.00273753	1.67e-32	4.74648
rs513533	A	G	0.103	0.1134	0.00233599	1e-200	0.824989
rs61905078	A	C	0.0729	0.203687	0.00269358	1e-200	0.128094
rs150423652	G	T	0.00698	0.263537	0.00869653	1e-200	0.0007015
rs34144542	A	G	0.0708	-0.0402173	0.00281225	2.16e-46	3.09914
rs73006585	G	C	0.0451	-0.02856	0.00339809	4.29e-17	2.49366
rs192619262	G	A	0.0235	-0.0329706	0.00545877	1.54e-09	0.508021
rs7138958	T	C	0.284	0.00953359	0.00165072	7.68e-09	887.409
rs76895963	T	G	0.0177	-0.106366	0.00579406	2.86e-75	0.0276911
rs4764474	T	C	0.18	0.0109451	0.0018782	5.63e-09	270.462
rs79719909	A	G	0.203	-0.0209836	0.00177201	2.38e-32	93.5906
rs4149056	T	C	0.156	0.0269286	0.00192378	1.61e-44	33.56
rs12320328	A	G	0.0794	-0.0179288	0.00261502	7.08e-12	19.6128
rs11183212	A	G	0.203	0.015882	0.00177828	4.22e-19	163.374
rs55770587	C	T	0.04	0.0236702	0.0036399	7.87e-11	2.85572
rs150490183	C	T	0.345	-0.0111299	0.00148892	7.71e-14	960.85
rs7964492	A	C	0.249	-0.0250571	0.00163276	3.74e-53	98.75
rs10877949	C	T	0.292	-0.00902057	0.00156421	8.08e-09	1047.85
rs2947793	G	A	0.0826	0.0170929	0.00253458	1.54e-11	23.3522
rs11615712	A	T	0.451	-0.00978025	0.00144645	1.37e-11	2126.44
rs324768	A	G	0.383	-0.00812035	0.0014756	3.73e-08	2224.58
rs11113118	G	A	0.237	0.0162687	0.00165094	6.57e-23	212.222
rs6606694	C	T	0.018	-0.0314298	0.00526914	2.45e-09	0.327991
rs2009170	T	C	0.256	-0.0128418	0.00162692	2.94e-15	397.4
rs940904	A	G	0.266	-0.0133325	0.00161148	1.3e-16	398.052
rs4765127	G	T	0.336	-0.0258987	0.00147991	1.43e-68	168.315
rs57541850	C	T	0.388	-0.0131214	0.00143624	6.48e-20	874.386
rs11057841	C	T	0.142	0.0192207	0.00204031	4.49e-21	54.5806
rs11148753	C	T	0.39	0.00832759	0.00144846	8.96e-09	2193.26
rs1340819	A	C	0.338	-0.00951866	0.00149156	1.75e-10	1260.9
rs2812208	G	C	0.0231	-0.0484982	0.00479347	4.62e-24	0.226868
rs2182784	C	A	0.22	0.0120362	0.00170597	1.72e-12	334.092
rs3105090	A	T	0.202	-0.0103499	0.00177093	5.09e-09	380.917
rs2298058	C	T	0.313	0.01823	0.00152541	6.42e-33	294.792
rs3825430	C	T	0.33	0.00897716	0.00150123	2.23e-09	1351.29
rs113235777	C	G	0.0126	-0.036821	0.00665717	3.18e-08	0.117098
rs6602909	T	C	0.33	0.0267961	0.00153134	1.47e-68	151.665
rs9604570	A	G	0.185	-0.0228931	0.00183993	1.54e-35	65.3032
rs111723834	G	A	0.0157	-0.0378942	0.00568346	2.6e-11	0.171654
rs7159513	G	A	0.171	0.0112776	0.00194601	6.82e-09	229.911
rs62017272	T	C	0.195	0.011175	0.00177995	3.42e-10	304.491
rs72683923	T	C	0.0173	-0.0379776	0.00557512	9.63e-12	0.207509
rs10132440	A	G	0.485	-0.00853824	0.00142323	1.98e-09	3226.61
rs216516	T	A	0.3	0.00932101	0.0015337	1.22e-09	1035.9
rs12878001	T	G	0.163	0.0204834	0.00190889	7.32e-27	63.3244
rs2526886	T	G	0.311	-0.00877725	0.00153914	1.18e-08	1255.46
rs2370982	C	T	0.208	0.00982374	0.00174881	1.94e-08	448.304
rs3825669	G	A	0.197	0.0130664	0.00177537	1.84e-13	227.311
rs7142571	C	A	0.404	0.00825519	0.00146218	1.64e-08	2395.02
rs61993685	T	C	0.071	-0.0206612	0.00276483	7.85e-14	11.8088
rs12891399	T	C	0.337	0.0121076	0.00149437	5.4e-16	774.718
rs8024137	T	A	0.146	-0.0109925	0.00200842	4.42e-08	176.406
rs72735627	C	T	0.0894	-0.0200281	0.00257103	6.71e-15	19.9249
rs147525635	A	G	0.446	-0.0123836	0.00149664	1.29e-16	1297.11
rs150844304	A	C	0.0271	0.134113	0.00433394	1e-200	0.0408316
rs74714416	C	T	0.0411	0.0292441	0.00364771	1.08e-15	1.97518
rs1532085	G	A	0.384	0.0282472	0.0014363	4.16e-86	184.804
rs1077835	A	G	0.214	0.0432883	0.00171287	6.43e-141	24.4392
rs12440800	A	T	0.261	0.0100314	0.0016062	4.23e-10	676.952
rs17184382	A	C	0.419	-0.0200915	0.00144205	4.01e-44	434.914
rs12902785	T	C	0.332	-0.00933295	0.00154768	1.64e-09	1265.43
rs3850986	T	G	0.319	-0.0107908	0.00151348	1.01e-12	873.925
rs67185399	G	A	0.0629	0.0162926	0.00295509	3.52e-08	14.9046
rs10152471	G	A	0.395	-0.0111974	0.00145131	1.21e-14	1244.4
rs1037117	G	A	0.252	0.014309	0.00164582	3.49e-18	310.158
rs143076454	G	A	0.0174	0.0433379	0.00571596	3.41e-14	0.161199
rs12600110	T	C	0.377	-0.0151071	0.0014751	1.29e-24	622.76
rs28577186	A	G	0.324	0.0109075	0.0015431	1.57e-12	882.347
rs7192366	G	C	0.5	-0.00801401	0.00143608	2.4e-08	3892.6
rs12928099	C	A	0.298	-0.025035	0.00154386	3.9e-59	141.689
rs7196161	A	G	0.375	-0.0145463	0.00145415	1.47e-23	664.596
rs62033400	A	G	0.401	0.0154351	0.00142867	3.3e-27	674.947
rs17231506	C	T	0.322	-0.0332697	0.00150157	9.01e-109	93.6729
rs77517043	G	A	0.0857	-0.0146756	0.00251682	5.51e-09	34.1012
rs6499240	G	A	0.417	-0.0160041	0.00144975	2.47e-28	678.906
rs34139543	C	T	0.106	0.0219433	0.00226678	3.65e-22	23.335
rs7200532	T	C	0.372	0.00861885	0.00146831	4.36e-09	1862.89
rs2925979	C	T	0.3	0.0262675	0.00152947	4.14e-66	130.438
rs8054124	T	C	0.232	0.0120502	0.00167314	5.93e-13	370.67
rs8050209	A	G	0.471	-0.00850879	0.00142353	2.27e-09	3064.12
rs9912287	G	A	0.219	0.0151564	0.00172363	1.45e-18	208.783
rs75679663	C	A	0.00783	-0.0830178	0.00807679	8.8e-25	0.00889572
rs11651783	C	T	0.225	0.0138439	0.00170023	3.88e-16	264.148
rs11654777	C	G	0.0621	0.0287516	0.00291841	6.73e-23	4.66508
rs8065497	G	A	0.416	0.0103387	0.00143796	6.49e-13	1619.03
rs62070804	C	T	0.0172	0.0385974	0.00546306	1.6e-12	0.198582
rs11079045	A	G	0.428	0.010382	0.00142047	2.69e-13	1699.52
rs145947882	A	C	0.0252	0.152743	0.0046679	1e-200	0.0272194
rs10775406	G	A	0.248	-0.0151127	0.00163533	2.43e-20	269.289
rs12953014	A	G	0.377	0.0162555	0.00146576	1.4e-28	537.876
rs79417738	A	G	0.211	0.0173393	0.00172583	9.48e-24	148.082
rs139260949	T	C	0.0544	-0.0236776	0.00312288	3.4e-14	5.27864
rs4247361	G	A	0.4	-0.00919677	0.00150627	1.02e-09	1891.69
rs11656743	A	G	0.211	0.0244235	0.00173877	8.1e-45	74.6361
rs193220	C	T	0.311	-0.0121065	0.00152585	2.12e-15	659.908
rs16971107	A	G	0.393	0.019431	0.00143136	5.62e-42	409.067
rs7218605	T	C	0.481	0.00876083	0.00140528	4.54e-10	3014.39
rs62078746	A	G	0.445	0.0107083	0.00144514	1.26e-13	1726.95
rs58292930	G	A	0.264	-0.0115165	0.00160935	8.31e-13	525.493
rs11664106	A	T	0.366	-0.0112732	0.00161101	2.6e-12	1054.07
rs13081	C	T	0.312	-0.00957888	0.00155348	7e-10	1060.91
rs35321365	T	C	0.481	0.0114625	0.00142652	9.34e-16	1760.89
rs1623060	C	T	0.492	-0.0147711	0.00140905	1.03e-25	1109.44
rs12962548	G	A	0.301	0.00982736	0.00152211	1.07e-10	938.122
rs113268469	C	T	0.0175	-0.0323184	0.00565419	1.09e-08	0.293208
rs12960928	T	C	0.271	0.0133588	0.00158961	4.32e-17	411.532
rs12454712	T	C	0.376	-0.0150472	0.00150423	1.47e-23	624.402
rs17884312	C	T	0.178	-0.0148307	0.00185972	1.53e-15	144.051
rs4804414	C	T	0.428	0.020176	0.00141779	5.92e-46	450.005
rs11878235	A	G	0.418	0.015862	0.00149654	3.01e-26	694.443
rs12891	G	C	0.422	-0.0108006	0.00148558	3.59e-13	1526.61
rs111500536	G	A	0.0603	-0.0412181	0.00299596	4.57e-43	2.14022
rs116843064	G	A	0.0197	-0.236583	0.00506952	1e-200	0.00693371
rs12610691	G	T	0.475	0.0103859	0.00144275	6.08e-13	2091.7
rs28568614	G	A	0.439	-0.00905325	0.00146793	6.94e-10	2351.36
rs2269869	A	G	0.241	0.0143124	0.00169317	2.84e-17	283.537
rs2228603	C	T	0.0754	-0.0841924	0.00266307	1e-200	0.802042
rs187429064	A	G	0.00982	-0.156943	0.00788426	3.62e-88	0.00391507
rs117924058	G	A	0.047	0.021235	0.00354397	2.07e-09	4.89882
rs10405944	T	C	0.475	-0.0103258	0.00147057	2.19e-12	2116.12
rs7256564	G	A	0.31	0.0144314	0.00151866	2.04e-21	461.431
rs111278137	G	A	0.0196	0.0335881	0.00524485	1.51e-10	0.340519
rs41290120	G	A	0.0435	0.0838303	0.0034506	2.25e-130	0.269263
rs283810	T	G	0.0662	0.0991644	0.00285491	1e-200	0.445661
rs117664574	C	G	0.0232	-0.0602182	0.00489853	9.86e-35	0.14843
rs71352241	G	T	0.0323	-0.0497966	0.0041768	9.07e-33	0.420732
rs874744	C	T	0.0215	0.0732316	0.0052256	1.28e-44	0.0861946
rs431420	G	T	0.195	-0.0114043	0.00181238	3.13e-10	292.369
rs7251733	G	A	0.161	0.0212055	0.00192036	2.38e-28	57.6441
rs1567518	G	A	0.464	-0.0097779	0.00144091	1.15e-11	2251.88
rs6051744	T	C	0.102	-0.0130778	0.00235053	2.64e-08	60.8318
rs151235402	C	T	0.0168	0.0475342	0.00563908	3.47e-17	0.124913
rs680379	G	A	0.395	0.00852066	0.00143086	2.6e-09	2149.06
rs67611724	C	T	0.147	0.0162319	0.00200392	5.49e-16	82.0155
rs4911382	T	C	0.405	-0.0108171	0.00144178	6.26e-14	1401.81
rs78185617	G	C	0.133	-0.018175	0.00205163	8.09e-19	53.5494
rs6028718	T	C	0.489	0.00816548	0.00142446	9.91e-09	3586.36
rs4812439	A	G	0.322	-0.0144977	0.0015265	2.15e-21	493.303
rs6129762	G	C	0.466	0.0111808	0.00142751	4.79e-15	1737.11
rs6065906	T	C	0.189	0.0498002	0.00179271	7.72e-170	14.4033
rs6066138	G	A	0.276	-0.0171254	0.00156974	1.04e-27	259.739
rs74963256	T	C	0.0977	0.0133141	0.00240594	3.13e-08	53.8475
rs6070139	G	A	0.406	-0.0149705	0.00142648	9.14e-26	735.495
rs1151625	C	T	0.0769	-0.017382	0.00263014	3.88e-11	19.5728
rs8126001	C	T	0.484	-0.0161169	0.00149176	3.3e-27	901.836
rs28756733	A	G	0.332	0.00889238	0.00153768	7.34e-09	1393.93
rs8130162	T	C	0.438	0.011225	0.00142544	3.41e-15	1522.56
rs960230	G	A	0.212	-0.0108518	0.0017371	4.18e-10	381.653
rs2838791	G	A	0.364	-0.00900973	0.00149858	1.83e-09	1632.22
rs35665085	G	A	0.0561	0.0217091	0.00308903	2.1e-12	6.67793
rs9612520	T	G	0.455	0.0107828	0.00143535	5.81e-14	1780.57
rs6005837	C	G	0.323	-0.0107963	0.00154102	2.45e-12	895.066
rs2530679	G	A	0.449	-0.0108904	0.00143292	2.96e-14	1699.83
rs5755799	C	G	0.453	0.00813962	0.00141568	8.94e-09	3097.33
rs4820325	A	G	0.419	-0.0208915	0.001438	8.03e-48	402.243
rs17032	C	G	0.328	0.0148602	0.00151025	7.6e-23	487.19
rs4253766	C	T	0.108	0.0217573	0.00225825	5.71e-22	24.6398
rs117563943	C	A	0.0443	-0.0238174	0.00361516	4.45e-11	3.45954
rs5771215	C	A	0.347	-0.00863672	0.00149634	7.84e-09	1614.21

## Sheet: Supplementary Table 8
Supplementary Table 8. Genetic variants that were used as instruments for Apolipoprotein A in Finn
SNP	Effect Allele	other allele	Beta	SE	P value	Effect Allele Frequency	F
rs2298214	C	A	-0.0131486	0.00199824	4.70002e-11	0.577488	43.2976
rs138150833	C	T	-0.0178374	0.00222449	1.10002e-15	0.273346	64.2987
rs79904668	G	A	0.0158321	0.00230527	6.4998e-12	0.661837	47.1665
rs577014789	T	C	0.0388594	0.00358074	1.9002e-27	0.918649	117.773
rs147324893	C	G	-0.0393293	0.00355947	2.19989e-28	0.084314	122.085
rs140476492	G	A	-0.0390515	0.00358182	1.10002e-27	0.08134	118.869
rs112330751	A	C	-0.0392136	0.00360088	1.29987e-27	0.080436	118.592
rs192315941	G	A	-0.0391669	0.00360118	1.50003e-27	0.080405	118.29
rs113287499	G	A	-0.0387036	0.00359946	5.79963e-27	0.080545	115.619
rs115445888	C	T	-0.0267034	0.00272687	1.20005e-22	0.151976	95.8968
rs41307925	C	T	-0.0374872	0.00370178	4.19952e-24	0.075923	102.552
rs2986946	A	G	0.0151894	0.00261844	6.59994e-09	0.195039	33.6508
rs2495488	T	C	0.0533183	0.00747617	9.8992e-13	0.017412	50.8621
rs6688946	A	G	-0.01525	0.00195677	6.4998e-15	0.531912	60.7379
rs115031828	G	T	-0.0151178	0.00196427	1.39991e-14	0.531918	59.2345
rs115087366	G	A	-0.0136152	0.00212697	1.5e-10	0.674341	40.9756
rs2489278	T	C	-0.015234	0.00207748	2.29985e-13	0.333487	53.7718
rs145144906	C	A	-0.0125486	0.00224869	2.39999e-08	0.255941	31.1409
rs12021640	A	G	0.0123827	0.00197313	3.50002e-10	0.569905	39.384
rs140584697	T	G	-0.0112494	0.00198924	1.6e-08	0.589726	31.9804
rs74971325	T	C	-0.0118766	0.00197233	1.7e-09	0.56407	36.2598
rs60326124	G	A	0.0291285	0.00213949	3.29989e-42	0.702624	185.36
rs59234976	T	C	0.0261863	0.0021075	1.9002e-35	0.685384	154.388
rs72470595	T	C	0.0256555	0.0021005	2.60016e-34	0.682283	149.182
rs72470598	A	C	0.0152369	0.00208362	2.60016e-13	0.338865	53.4757
rs114012769	A	T	0.0137454	0.0022048	4.49997e-10	0.270913	38.8666
rs137863666	C	T	0.0172329	0.00254725	1.29987e-11	0.816885	45.7692
rs144326340	T	C	0.0160813	0.00289751	2.90001e-08	0.868473	30.803
rs10927047	T	A	0.0167313	0.00289036	7.10003e-09	0.865588	33.5085
rs11127044	C	G	0.0240774	0.00202053	9.70063e-33	0.384581	142
rs72810546	G	A	0.0180791	0.00237182	2.49977e-14	0.781635	58.1019
rs17006439	G	A	0.0177282	0.00236344	6.29941e-14	0.78029	56.2652
rs141523783	C	T	-0.0148115	0.00241086	8.10009e-10	0.208531	37.7445
rs36025786	A	G	-0.0143858	0.00240758	2.30001e-09	0.209362	35.7032
rs323645	G	A	-0.0115424	0.00198701	6.29999e-09	0.415283	33.7437
rs72932409	T	G	0.01546	0.00227019	9.79941e-12	0.247471	46.3761
rs111973496	A	G	0.0128028	0.00197374	8.80035e-11	0.445941	42.0756
rs13415932	A	C	0.0140855	0.00203767	4.79954e-12	0.364946	47.7834
rs76772145	A	T	-0.0256666	0.00210473	3.29989e-34	0.315663	148.711
rs150357933	T	G	0.0187564	0.00202144	1.69981e-20	0.403742	86.0949
rs13032993	T	C	-0.0662337	0.00504914	2.60016e-39	0.050441	172.077
rs61733623	A	G	-0.0924712	0.0141025	5.50047e-11	0.005079	42.9953
rs77748152	G	A	0.0127017	0.00231129	3.89996e-08	0.764293	30.2005
rs76082446	G	A	-0.0124082	0.00201444	7.29995e-10	0.546836	37.941
rs141157918	T	A	0.0208987	0.00339813	7.69999e-10	0.09165	37.8232
rs62266503	C	G	-0.0120741	0.00209195	7.79992e-09	0.32728	33.3125
rs4241399	T	C	-0.0171881	0.00200802	1.10002e-17	0.550926	73.2689
rs3789739	C	T	-0.01333	0.00203151	5.30029e-11	0.614914	43.0549
rs28886962	T	C	-0.0131745	0.00203243	8.99912e-11	0.368546	42.0182
rs76250438	G	A	-0.0192996	0.00261805	1.69981e-13	0.17027	54.3426
rs62410888	C	A	-0.0219309	0.00265107	1.29987e-16	0.165527	68.4338
rs149371651	T	C	-0.0222015	0.0026563	6.4003e-17	0.166112	69.8571
rs75272982	A	G	0.021021	0.00258322	4.00037e-16	0.824385	66.2192
rs35019821	G	A	-0.0210094	0.00258002	3.90032e-16	0.175427	66.3103
rs6531734	T	C	0.0155609	0.00196562	2.39994e-15	0.505137	62.6715
rs2631242	T	C	-0.0630716	0.00406687	2.99985e-54	0.061968	240.518
rs11736322	C	T	0.0162773	0.00202476	9.09913e-16	0.608281	64.6275
rs11943915	C	T	-0.064937	0.00365522	1.29987e-70	0.083317	315.615
rs73836548	T	C	0.0253889	0.00234716	2.90001e-27	0.773098	117.004
rs114087689	C	T	0.0139555	0.00245139	1.2e-08	0.200287	32.409
rs113502977	G	C	0.0126533	0.00229173	3.40001e-08	0.242436	30.4846
rs116807778	T	C	-0.0140153	0.0019653	9.8992e-13	0.484622	50.8566
rs11738755	A	G	-0.0130832	0.00217094	1.7e-09	0.294101	36.3189
rs140638982	G	A	-0.0266309	0.00417771	1.79999e-10	0.059837	40.6345
rs72750252	A	G	0.0293196	0.00417564	2.19989e-12	0.939214	49.3026
rs114826502	C	T	0.0143872	0.00252659	1.2e-08	0.187922	32.4252
rs73333517	A	G	-0.0143092	0.00252468	1.40001e-08	0.81346	32.1231
rs145175012	C	T	0.0220262	0.0022839	5.19996e-22	0.247166	93.009
rs139897485	A	G	-0.0204871	0.00225254	9.3994e-20	0.741517	82.721
rs114402902	T	C	-0.0202394	0.00228467	8.10028e-19	0.755465	78.4781
rs72794402	T	C	0.0125218	0.0022612	3.09999e-08	0.25584	30.6659
rs17164236	A	G	0.0150589	0.00276249	5e-08	0.153449	29.7156
rs241056	G	A	0.0184158	0.00309396	2.59998e-09	0.114501	35.4284
rs114167666	G	A	0.0172361	0.00305357	1.7e-08	0.117609	31.8612
rs116789390	G	A	-0.030303	0.0030851	8.99912e-23	0.113633	96.479
rs148071727	G	A	-0.0300771	0.00305213	6.59933e-23	0.116601	97.1104
rs146674992	G	A	-0.0305467	0.0030474	1.20005e-23	0.117011	100.478
rs115050355	C	T	-0.0303441	0.00287074	4.10015e-26	0.134226	111.728
rs75361283	G	A	-0.0302365	0.00278205	1.59993e-27	0.144892	118.123
rs139968057	G	A	-0.0302696	0.00279407	2.39994e-27	0.143375	117.365
rs137981582	A	G	-0.0297613	0.00277189	6.79986e-27	0.147639	115.279
rs115568381	C	G	-0.018207	0.00224924	5.70033e-16	0.254789	65.5247
rs116746348	A	C	0.0246223	0.00200413	1.10002e-34	0.589656	150.94
rs112317305	T	C	0.0253	0.00201526	3.80014e-36	0.620192	157.608
rs189709073	T	G	-0.0319404	0.00289023	2.19989e-28	0.133564	122.128
rs2744938	A	G	-0.0400977	0.00338901	2.70023e-32	0.093405	139.989
rs9387488	G	A	-0.0137225	0.00222223	6.59994e-10	0.735095	38.1319
rs146291514	C	T	0.0128705	0.00199287	1.09999e-10	0.422337	41.7093
rs7760549	T	C	0.0124631	0.00198767	3.59998e-10	0.418624	39.3155
rs62430969	A	G	0.0260366	0.00276125	4.10015e-21	0.148164	88.9113
rs143523673	G	A	0.0155332	0.00227368	8.4004e-12	0.24726	46.6727
rs77550036	T	G	-0.0203768	0.00197876	7.19946e-25	0.441279	106.044
rs118040890	G	C	-0.0145117	0.00236036	7.79992e-10	0.750318	37.799
rs35235058	G	A	0.0276426	0.00229436	1.99986e-33	0.240146	145.156
rs118094116	C	G	-0.0206071	0.00201182	1.29987e-24	0.594917	104.919
rs116906269	A	G	0.0185795	0.00196702	3.50026e-21	0.461374	89.2176
rs34610704	A	G	0.0282647	0.00229406	7.00003e-35	0.240435	151.803
rs80242092	G	T	0.0281959	0.00229954	1.50003e-34	0.23854	150.345
rs35062734	C	T	0.0285304	0.00230497	3.40017e-35	0.237408	153.209
rs185547176	G	A	0.0281889	0.00230155	1.69981e-34	0.237932	150.008
rs116306774	G	A	0.0342092	0.00583276	4.49997e-09	0.031501	34.3984
rs12678300	G	A	-0.0121174	0.00199318	1.2e-09	0.412293	36.9595
rs73298385	C	T	-0.0206899	0.00377	4.09996e-08	0.072678	30.1186
rs62511738	C	T	-0.0232162	0.00196791	4.00037e-32	0.504446	139.178
rs3808438	T	C	0.0349486	0.00198138	1.20005e-69	0.56854	311.117
rs74337560	T	C	0.0134433	0.00199662	1.69981e-11	0.583456	45.3337
rs11985896	A	G	0.01161	0.0020226	9.49992e-09	0.626199	32.9492
rs56280815	C	T	-0.0184583	0.00217377	1.99986e-17	0.718003	72.1035
rs118078018	G	T	-0.017549	0.00208567	4.00037e-17	0.654396	70.7968
rs6420183	C	T	0.0176407	0.00214764	2.09991e-16	0.295829	67.4697
rs11774034	G	A	0.0362105	0.002519	7.39946e-47	0.184902	206.639
rs148858677	G	A	-0.0185919	0.0022391	1e-16	0.723042	68.9446
rs2028002	T	C	-0.0268072	0.00285447	5.90065e-21	0.863549	88.1966
rs150472003	T	G	0.0112665	0.00197793	1.2e-08	0.554947	32.4456
rs145948481	A	G	0.0197762	0.00309757	1.7e-10	0.112902	40.7609
rs181900507	A	G	0.0199803	0.0031067	1.29999e-10	0.112384	41.3624
rs61855867	G	C	0.0213558	0.00314006	1e-11	0.109552	46.2547
rs55658310	T	G	0.0213243	0.00313972	1.10002e-11	0.109609	46.1283
rs191178220	C	T	0.0119766	0.00214928	2.5e-08	0.698826	31.0514
rs76698944	C	T	0.0321581	0.00259635	3.10027e-35	0.173781	153.41
rs78553679	G	A	-0.0340853	0.00229746	8.60003e-50	0.75984	220.109
rs112294514	G	A	0.0338744	0.0022975	3.40017e-49	0.239527	217.386
rs34663276	A	G	0.0340389	0.00229973	1.39991e-49	0.239106	219.077
rs61854121	T	C	-0.0176413	0.00231782	2.70023e-14	0.23596	57.9298
rs368332850	A	C	0.0309916	0.00318639	2.29985e-22	0.121562	94.5998
rs58389996	A	G	-0.0127981	0.00219221	5.30005e-09	0.276322	34.0821
rs2862952	G	A	0.022096	0.00196056	1.80011e-29	0.496282	127.019
rs2007210	T	C	0.0203542	0.001974	6.29941e-25	0.44242	106.32
rs34886849	T	C	-0.0254822	0.0034526	1.59993e-13	0.088659	54.473
rs34537064	A	G	-0.0236805	0.00338959	2.80027e-12	0.092519	48.8076
rs76468001	C	T	-0.0252016	0.00346255	3.40017e-13	0.088164	52.9742
rs142041625	G	A	-0.0198784	0.00298372	2.70023e-11	0.123492	44.3861
rs73379040	G	A	0.0112418	0.0019672	1.09999e-08	0.520308	32.6569
rs2239897	A	G	0.0170138	0.00273408	4.90004e-10	0.84229	38.724
rs2237902	G	C	0.0301993	0.00344918	1.99986e-18	0.910728	76.6588
rs438263	C	A	-0.045621	0.00684721	2.70023e-11	0.027731	44.3918
rs4986811	T	G	-0.0126127	0.00210937	2.19999e-09	0.315698	35.7528
rs117654335	G	A	0.0132272	0.00216993	1.09999e-09	0.710891	37.1573
rs147556125	G	A	0.0300816	0.00289633	2.90001e-25	0.131996	107.871
rs112395972	C	T	0.0315287	0.00305501	5.70033e-25	0.116107	106.509
rs150484219	A	G	0.0296491	0.00289002	1.10002e-24	0.13231	105.25
rs4881826	G	C	0.0296394	0.00288874	1.10002e-24	0.132323	105.274
rs147078827	T	C	0.032582	0.00310578	9.49948e-26	0.113717	110.056
rs371438231	G	A	0.0282588	0.0030667	3.10027e-20	0.140063	84.9112
rs141509285	G	A	-0.0203664	0.00302844	1.80011e-11	0.117674	45.2263
rs144373124	C	T	0.0298738	0.00292502	1.69981e-24	0.128034	104.309
rs2553193	G	A	-0.0339604	0.00550416	6.80002e-10	0.033379	38.0683
rs139438701	G	T	-0.0300702	0.00297021	4.30031e-24	0.875413	102.494
rs147745100	A	T	0.0303064	0.00297857	2.60016e-24	0.123895	103.527
rs563988505	C	A	0.0221302	0.00242003	6.00067e-20	0.206338	83.6237
rs151166354	C	A	0.0308741	0.00374082	1.50003e-16	0.074485	68.1169
rs71465403	T	C	-0.0151058	0.00212256	1.10002e-12	0.312919	50.6486
rs2229738	C	T	-0.0156821	0.00211597	1.29987e-13	0.314963	54.9274
rs75920908	G	A	0.0177666	0.00213987	1e-16	0.298522	68.9341
rs11213272	A	G	-0.0185849	0.00228189	3.80014e-16	0.753765	66.3332
rs4936353	A	G	-0.0608276	0.00778573	5.60015e-15	0.016122	61.0383
rs7927820	G	A	0.0942905	0.00249861	1e-200	0.193078	1424.09
rs676234	A	G	-0.057004	0.00410744	8.60003e-44	0.060767	192.605
rs140484568	T	A	0.0827849	0.00287141	8.79023e-183	0.134434	831.212
rs112704540	A	G	-0.0826586	0.0028751	9.09913e-182	0.86528	826.552
rs142187841	G	A	0.10855	0.00558024	2.80027e-84	0.031839	378.402
rs9332865	G	A	0.0236261	0.00297123	1.80011e-15	0.124123	63.2283
rs17126684	A	C	-0.0203128	0.00201512	6.79986e-24	0.616358	101.61
rs75111123	A	C	-0.0220506	0.0037157	2.90001e-09	0.07472	35.2176
rs35652134	T	C	0.0222366	0.00247597	2.70023e-19	0.197912	80.6577
rs80181285	T	A	0.0141671	0.00204312	4.10015e-12	0.367132	48.0811
rs74595359	G	C	-0.0151563	0.00272585	2.69998e-08	0.155716	30.9159
rs3001428	A	G	0.0144413	0.00211509	8.60003e-12	0.31376	46.6181
rs7979451	C	T	-0.0265003	0.00342824	1.10002e-14	0.093833	59.7529
rs117113194	G	A	-0.0228923	0.00229085	1.59993e-23	0.251116	99.8586
rs140255867	A	G	0.0272517	0.00229248	1.39991e-32	0.239534	141.311
rs144609873	G	A	0.02676	0.00231653	7.19946e-31	0.233915	133.443
rs73133366	G	A	-0.0239572	0.00227972	7.89951e-26	0.245375	110.436
rs117605132	A	G	0.0277155	0.00229129	1.10002e-33	0.240776	146.314
rs113229733	G	A	0.0275911	0.00228876	1.80011e-33	0.240981	145.324
rs117118210	C	T	0.0128878	0.00203895	2.59998e-10	0.638143	39.9525
rs739497	C	T	0.0156995	0.00196208	1.20005e-15	0.503638	64.0233
rs55843500	A	G	-0.183699	0.0248603	1.50003e-13	0.001719	54.601
rs76106002	C	T	0.0129703	0.00198613	6.59933e-11	0.568305	42.6466
rs7316139	C	A	0.0118556	0.00196342	1.6e-09	0.503186	36.4603
rs117415461	A	G	0.0121097	0.0020252	2.19999e-09	0.619766	35.7545
rs1337939	T	C	-0.0266274	0.00451423	3.69999e-09	0.050053	34.7929
rs74709091	C	A	0.016786	0.00196933	1.50003e-17	0.542621	72.6537
rs76927655	A	G	0.0191984	0.0020734	2.09991e-20	0.662548	85.7361
rs12593315	G	A	0.0200816	0.0019803	3.59998e-24	0.568932	102.834
rs56902655	T	G	-0.0119972	0.00199097	1.7e-09	0.41251	36.3103
rs11630012	G	T	0.0144282	0.00209601	5.79963e-12	0.32061	47.3846
rs6598485	T	C	0.0159618	0.00225056	1.29987e-12	0.256937	50.3017
rs546232407	T	C	0.0127683	0.00225348	1.5e-08	0.631526	32.104
rs370188553	G	A	-0.0118773	0.00213546	2.69998e-08	0.296289	30.9352
rs140277827	T	A	-0.0124025	0.00197989	3.69999e-10	0.418701	39.2407
rs374921434	A	G	0.0131639	0.00213661	7.19996e-10	0.297226	37.9593
rs4985153	T	C	0.0127683	0.0021482	2.80001e-09	0.295748	35.3278
rs71387165	C	T	0.0335816	0.00459451	2.70023e-13	0.952509	53.4225
rs223849	A	T	0.0126498	0.00214158	3.50002e-09	0.700365	34.8898
rs149868087	C	T	-0.016666	0.00272689	9.90011e-10	0.151182	37.3532
rs2033251	G	A	-0.0173681	0.0026836	9.70063e-11	0.156404	41.886
rs147974389	C	A	0.0149182	0.00260327	1e-08	0.831187	32.8393
rs74637502	T	C	0.019036	0.00268461	1.29987e-12	0.157027	50.2793
rs117811389	T	G	0.0180416	0.00266222	1.20005e-11	0.160036	45.9264
rs10852890	G	A	-0.0155496	0.00217141	8.00018e-13	0.29008	51.2808
rs28655557	A	G	0.0139228	0.00202891	6.79986e-12	0.373486	47.0899
rs894505	G	C	-0.0140798	0.00198273	1.20005e-12	0.549527	50.4273
rs11652218	C	T	0.0120556	0.00196443	8.40001e-10	0.498479	37.6621
rs111353152	A	C	0.0130005	0.00204405	2e-10	0.369019	40.4517
rs117114580	C	T	0.0196412	0.00330804	2.90001e-09	0.097132	35.2529
rs12150778	A	G	-0.0139463	0.00201982	5.00035e-12	0.616402	47.6752
rs139138173	G	A	0.0140134	0.00204573	7.39946e-12	0.358627	46.9235
rs147770694	G	T	-0.0145776	0.00202711	6.4003e-13	0.624924	51.7151
rs3765622	G	C	-0.0165331	0.00215035	1.50003e-14	0.704152	59.114
rs62095067	C	T	-0.0213669	0.00221605	5.30029e-22	0.268307	92.966
rs142874203	A	C	-0.0211885	0.00221593	1.20005e-21	0.268511	91.4299
rs117035396	A	G	0.0452391	0.00785416	8.40001e-09	0.016686	33.1763
rs8097783	G	A	0.0498625	0.00704969	1.50003e-12	0.01984	50.0274
rs12480772	T	C	-0.0566319	0.00389376	6.4003e-48	0.072151	211.536
rs139261645	T	C	-0.0169586	0.00213593	1.99986e-15	0.402884	63.0385
rs144044427	A	T	-0.0982633	0.0146519	1.99986e-11	0.005321	44.9774
rs78835202	T	A	-0.0110068	0.00198557	2.99999e-08	0.573095	30.7292
rs914561	T	C	-0.0124679	0.00196537	2.19999e-10	0.482297	40.2437
rs75451331	G	T	0.0158916	0.00210165	4.00037e-14	0.334045	57.1761
rs80261034	G	C	0.0142353	0.00247907	9.29994e-09	0.197231	32.9728
rs9627800	T	C	-0.0156495	0.00241083	8.49963e-11	0.223124	42.1374

## Sheet: Supplementary Table 9
Supplementary Table 9. Genetic variants that were used as instruments for Apolipoprotein B in Finn
SNP	Effect Allele	other allele	Beta	SE	P value	Effect Allele Frequency	F
rs74389623	T	G	-0.0257618	0.00208271	3.80014e-35	0.440713	153.001
rs35530120	A	G	-0.0287272	0.00210159	1.50003e-42	0.420116	186.849
rs143876787	C	A	-0.0580968	0.00609013	1.39991e-21	0.965921	91.0021
rs12746810	G	A	0.0903258	0.00692945	7.70016e-39	0.023148	169.913
rs61786484	C	T	0.0284065	0.00378867	6.4998e-14	0.081327	56.2163
rs75547743	C	T	0.0284712	0.00378981	5.79963e-14	0.081299	56.4387
rs114245825	A	T	0.0284308	0.00378858	6.20012e-14	0.081326	56.3151
rs77216962	T	C	0.0284789	0.0037896	5.70033e-14	0.081281	56.4754
rs147496654	T	G	0.0284748	0.00378857	5.60015e-14	0.081337	56.4899
rs79569112	A	G	0.028466	0.00378678	5.60015e-14	0.081451	56.5084
rs140476492	G	A	0.0285414	0.00378925	5.00035e-14	0.081326	56.7341
rs112585488	C	T	0.0899682	0.00695643	2.90001e-38	0.023391	167.265
rs45596631	C	A	-0.0159507	0.00273138	5.19996e-09	0.806271	34.1032
rs115750459	G	A	0.0282689	0.00382724	1.50003e-13	0.079797	54.5565
rs150698599	G	A	-0.0126655	0.00212834	2.69998e-09	0.383309	35.413
rs41307925	C	T	0.028594	0.0039156	2.80027e-13	0.075941	53.3277
rs148612186	T	A	0.0270478	0.00381812	1.39991e-12	0.080001	50.1839
rs566844	C	T	0.0614285	0.00644223	1.50003e-21	0.029267	90.9217
rs1544909	T	C	0.0180511	0.00255518	1.59993e-12	0.792855	49.9073
rs2433673	C	G	-0.187392	0.0118538	2.70023e-56	0.008399	249.912
rs2986946	A	G	-0.0550823	0.00276929	4.90004e-88	0.195027	395.628
rs2495488	T	C	-0.345954	0.00790085	1e-200	0.017452	1917.3
rs2483205	C	T	0.0406412	0.00217107	3.40017e-78	0.648393	350.417
rs148742777	T	C	0.0648413	0.0058539	1.59993e-28	0.032281	122.691
rs4927206	G	A	0.0315877	0.00213919	2.39994e-49	0.624842	218.041
rs144656223	T	C	-0.0351443	0.0028827	3.50026e-34	0.152014	148.632
rs11806259	A	G	-0.0341071	0.00444138	1.59993e-14	0.05793	58.9731
rs116293108	G	A	-0.0331865	0.00442231	6.20012e-14	0.058351	56.3151
rs35553029	G	T	0.0226777	0.00253068	3.19963e-19	0.781959	80.3015
rs761484	C	T	0.027092	0.00426231	2.1e-10	0.063964	40.401
rs9633424	C	T	-0.203885	0.0183045	8.10028e-29	0.0034	124.067
rs2994560	G	A	0.0118792	0.00216223	3.89996e-08	0.587202	30.1836
rs3845453	C	T	-0.0142236	0.00221282	1.29999e-10	0.672078	41.3168
rs75216965	T	A	0.0142998	0.00220504	8.9002e-11	0.328884	42.0559
rs2452903	G	A	0.0143828	0.0022044	6.79986e-11	0.329039	42.5702
rs111567021	T	A	0.0124643	0.00215699	7.49998e-09	0.359747	33.3918
rs116345015	A	G	-0.0140657	0.00220618	1.79999e-10	0.661842	40.6482
rs146527715	A	G	0.0132051	0.00218454	1.5e-09	0.341426	36.5396
rs60326124	G	A	0.0166097	0.00226314	2.09991e-13	0.702602	53.8643
rs72472329	G	A	0.0161711	0.00236509	8.10028e-12	0.260342	46.7502
rs76732756	G	A	-0.01537	0.00223113	5.60015e-12	0.3176	47.4567
rs2642432	T	C	0.016303	0.0022052	1.39991e-13	0.671347	54.6562
rs61819179	A	G	0.0162953	0.00221305	1.80011e-13	0.673659	54.2178
rs116623828	T	A	0.0163157	0.00221855	1.9002e-13	0.673793	54.0845
rs150860462	G	A	-0.0162539	0.00224009	4.00037e-13	0.32204	52.6483
rs148298023	G	A	-0.0153856	0.00227087	1.20005e-11	0.293789	45.9033
rs79603702	G	A	0.0303549	0.00438017	4.19952e-12	0.060644	48.0259
rs576520006	A	C	-0.0265504	0.00208969	5.50047e-37	0.436797	161.428
rs138235372	C	T	0.0203083	0.00214289	2.60016e-21	0.601484	89.8147
rs112889370	A	T	-0.0207343	0.00213623	2.80027e-22	0.377992	94.2069
rs113813957	A	C	-0.0211376	0.00212109	2.19989e-23	0.394863	99.31
rs144683582	G	A	-0.0363831	0.00380831	1.29987e-21	0.918489	91.2714
rs11127044	C	G	0.0483002	0.00213548	2.89734e-113	0.384622	511.572
rs144433805	T	C	-0.0356487	0.00237083	4.19952e-51	0.742744	226.093
rs77474786	G	A	-0.028524	0.00339126	4.10015e-17	0.119028	70.7455
rs7592249	G	T	0.0339758	0.00256184	3.80014e-40	0.20578	175.888
rs190848277	T	C	-0.0267034	0.00244786	1e-27	0.238555	119.004
rs56387717	G	A	0.0204268	0.00249708	2.80027e-16	0.780169	66.9169
rs145482534	G	T	0.0199204	0.00249427	1.39991e-15	0.779602	63.7836
rs141415727	G	A	-0.0195653	0.00269566	3.90032e-13	0.179372	52.6796
rs17006439	G	A	0.0203257	0.00249703	4.00037e-16	0.780233	66.2588
rs79756901	G	A	0.026612	0.00346526	1.59993e-14	0.099867	58.9771
rs10166029	C	G	-0.0174963	0.00267259	5.90065e-11	0.802793	42.8576
rs74473330	C	T	0.0157697	0.00263094	2e-09	0.190511	35.9273
rs139214757	C	T	0.0186372	0.00295063	2.69998e-10	0.142976	39.8962
rs78959419	T	C	-0.0185293	0.00294985	3.40001e-10	0.856912	39.4565
rs1250268	T	C	0.0133049	0.00232436	1e-08	0.728561	32.7655
rs143764316	T	C	0.0141509	0.00235577	1.89998e-09	0.736741	36.083
rs1250248	A	G	0.0141082	0.00235506	2.1e-09	0.736479	35.8872
rs55770838	A	C	-0.0339148	0.00397399	1.39991e-17	0.074356	72.8325
rs146177116	T	C	-0.0312184	0.0038061	2.39994e-16	0.081346	67.2761
rs62252144	G	C	-0.024276	0.00328945	1.59993e-13	0.112851	54.4638
rs142440969	G	A	-0.0309563	0.00382301	5.60015e-16	0.080428	65.5673
rs12494738	C	T	-0.029663	0.00380454	6.4003e-15	0.081069	60.7891
rs12486789	G	T	0.0116603	0.00212484	4.09996e-08	0.418529	30.1139
rs9817946	A	G	-0.0146084	0.00224287	7.39946e-11	0.363839	42.4226
rs35118562	C	T	0.0117911	0.0021132	2.39999e-08	0.421148	31.1335
rs9855968	C	T	0.0134535	0.00218166	7.00003e-10	0.648037	38.0274
rs62250969	A	G	0.0116926	0.0021135	3.2e-08	0.418236	30.6068
rs149309005	G	A	0.0127331	0.00219312	6.4e-09	0.653879	33.7088
rs78820208	G	A	0.0128856	0.00209764	8.10009e-10	0.430863	37.7353
rs78788641	C	G	-0.015751	0.00240983	6.29941e-11	0.253944	42.7212
rs3789739	C	T	-0.0229367	0.00215262	1.59993e-26	0.614849	113.534
rs144916223	G	A	0.0190814	0.0031171	9.29994e-10	0.127102	37.473
rs17804577	G	A	0.0185828	0.00275688	1.59993e-11	0.173657	45.4346
rs112082259	C	T	0.0197777	0.0027781	1.10002e-12	0.168283	50.6822
rs3804348	C	A	0.022947	0.00330677	3.90032e-12	0.112673	48.1553
rs116725720	G	A	-0.0226152	0.00237064	1.39991e-21	0.735492	91.0059
rs1203107	C	T	0.019159	0.00212182	1.69981e-19	0.411826	81.5321
rs115561442	C	T	0.0144881	0.00219276	3.90032e-11	0.651749	43.6557
rs10027913	C	G	0.0193954	0.00229659	2.99985e-17	0.293425	71.3232
rs78439748	C	T	0.0239621	0.00336741	1.10002e-12	0.109147	50.6358
rs150118124	A	T	0.0127026	0.00225108	1.7e-08	0.690921	31.8422
rs76316256	G	A	0.0127232	0.00223309	1.2e-08	0.683526	32.4624
rs11932810	A	C	0.0123416	0.00213669	7.59994e-09	0.615009	33.3626
rs116387469	C	T	0.01413	0.00227098	4.90004e-10	0.672286	38.7131
rs2137231	T	C	-0.0170661	0.00285075	2.1e-09	0.757609	35.8385
rs73243878	G	A	0.0156939	0.0027319	9.20005e-09	0.175659	33.0014
rs75272982	A	G	-0.0156452	0.00273514	1.09999e-08	0.824438	32.7192
rs35019821	G	A	0.0158541	0.00273172	6.49995e-09	0.17538	33.683
rs58700731	G	T	0.0156938	0.00272781	8.79995e-09	0.175867	33.1
rs115706262	G	A	0.0155502	0.00272641	1.2e-08	0.175944	32.5304
rs278928	A	G	0.0148256	0.00239561	6.1e-10	0.758151	38.2994
rs80043425	T	C	-0.0565047	0.00522116	2.70023e-27	0.041817	117.121
rs113932657	C	T	-0.0631344	0.0056057	1.99986e-29	0.036007	126.845
rs244483	C	T	-0.0630426	0.00525908	4.10015e-33	0.040887	143.697
rs2173525	C	A	-0.0632388	0.00526431	2.99985e-33	0.040841	144.306
rs62358385	C	G	-0.0236596	0.00276858	1.29987e-17	0.169804	73.0299
rs79259373	C	T	-0.0210745	0.00282543	8.69961e-14	0.161285	55.6347
rs274548	T	C	-0.0200281	0.00266165	5.30029e-14	0.188327	56.621
rs62385689	C	T	-0.0200053	0.00266203	5.70033e-14	0.188284	56.476
rs13152885	G	C	-0.0196039	0.0026573	1.59993e-13	0.188835	54.4257
rs115482506	G	C	0.0340485	0.00588981	7.39997e-09	0.032424	33.419
rs75628933	T	G	0.0346574	0.00575914	1.79999e-09	0.033855	36.214
rs111940088	A	G	0.036954	0.00601424	8e-10	0.030938	37.7539
rs62382390	A	G	0.0376886	0.00629792	2.19999e-09	0.028297	35.8118
rs149227414	C	T	-0.0288861	0.00222073	1.10002e-38	0.328733	169.195
rs145476560	G	T	0.0290802	0.00217109	6.4998e-41	0.645551	179.407
rs62382400	C	T	-0.0184301	0.00265451	3.80014e-12	0.188861	48.2044
rs1973491	C	T	0.0219505	0.0021475	1.59993e-24	0.373722	104.477
rs12515585	A	G	0.0312066	0.00217206	8.30042e-47	0.644582	206.419
rs79479846	T	C	0.0184209	0.00215439	1.20005e-17	0.382095	73.1094
rs116445967	T	A	0.0192481	0.0025636	6.00067e-14	0.790078	56.3735
rs11952686	G	A	-0.0173845	0.00264291	4.79954e-11	0.200679	43.2673
rs143446357	A	C	0.0173151	0.00272508	2.1e-10	0.822468	40.373
rs72805187	A	G	0.0177795	0.00268496	3.50026e-11	0.816604	43.8494
rs1569734	T	C	-0.022804	0.00399543	1.09999e-08	0.073543	32.5758
rs41271809	T	C	-0.0221085	0.00316762	2.99985e-12	0.1235	48.7138
rs1980884	A	G	-0.0283216	0.00349068	4.90004e-16	0.097465	65.8287
rs10447389	G	A	-0.0294463	0.00342244	7.70016e-18	0.10285	74.0269
rs57400201	G	A	-0.0122871	0.00224134	4.20001e-08	0.2914	30.0527
rs12213283	C	T	-0.0129909	0.00211682	8.40001e-10	0.398102	37.6626
rs75851425	G	C	-0.0130466	0.00211789	7.29995e-10	0.396605	37.9479
rs10946807	T	C	-0.0537922	0.00390806	4.19952e-43	0.076094	189.459
rs55738882	C	T	0.0275047	0.00297635	2.39994e-20	0.85174	85.3976
rs41266803	C	T	0.0130618	0.00232896	2e-08	0.273508	31.4544
rs11754289	C	G	0.0128757	0.0023314	3.29997e-08	0.277763	30.5006
rs113255008	G	A	-0.0301521	0.00376715	1.20005e-15	0.086192	64.0633
rs200472	C	A	-0.0333303	0.00380829	2.09991e-18	0.087084	76.5982
rs72848777	T	C	-0.0312602	0.00361326	5.10035e-18	0.091563	74.8488
rs17765491	C	A	-0.0325982	0.00366108	5.40008e-19	0.089823	79.2809
rs2232422	G	A	-0.028657	0.00365319	4.40048e-15	0.088328	61.5343
rs9258468	G	A	0.0136825	0.00207207	4.00037e-11	0.497779	43.6036
rs17185363	A	G	0.0208967	0.0030116	4.00037e-12	0.137396	48.1461
rs9258742	C	T	0.01401	0.00208933	1.99986e-11	0.440187	44.9637
rs72838635	T	C	0.0224003	0.00282207	2.09991e-15	0.549141	63.0046
rs115855251	G	A	0.0209004	0.00289297	5.00035e-13	0.151728	52.1941
rs77478237	A	G	0.0196746	0.00292102	1.59993e-11	0.147627	45.3673
rs9262568	A	G	0.0208233	0.00316672	4.79954e-11	0.121901	43.2394
rs7771486	G	C	0.0227301	0.00357509	2e-10	0.092351	40.423
rs55654249	T	A	0.0201856	0.00280648	6.4003e-13	0.162768	51.732
rs36001438	G	A	0.0219056	0.00308887	1.29987e-12	0.129293	50.2934
rs139101653	C	T	0.012602	0.0023011	4.30002e-08	0.710637	29.9922
rs4398729	G	A	0.013706	0.00207922	4.30031e-11	0.460188	43.4531
rs116626221	C	T	0.0181485	0.0022788	1.69981e-15	0.291538	63.4263
rs17220087	C	A	0.0207752	0.00240796	6.29941e-18	0.245335	74.4375
rs60066220	C	A	0.0210527	0.00240854	2.29985e-18	0.245932	76.4026
rs2744938	A	G	-0.0275504	0.00359125	1.69981e-14	0.093236	58.8524
rs34374374	T	C	-0.0212724	0.00298499	1e-12	0.140195	50.7864
rs142401787	G	A	-0.0214873	0.00299257	7.00003e-13	0.139306	51.5555
rs76419500	G	A	0.0215225	0.00298631	5.70033e-13	0.86001	51.9416
rs75620193	G	A	-0.0270307	0.00342205	2.80027e-15	0.104136	62.3939
rs6913941	A	G	0.0251868	0.00339639	1.20005e-13	0.89432	54.9934
rs35482422	C	T	-0.0114617	0.0020864	3.89996e-08	0.522552	30.1789
rs79666521	A	G	0.0114608	0.00208931	4.09996e-08	0.478466	30.0901
rs114497543	G	A	0.0162104	0.00227025	9.30037e-13	0.297802	50.9847
rs2208790	G	A	0.0142612	0.00222699	1.5e-10	0.31932	41.0087
rs2815025	G	A	0.016255	0.00226653	7.39946e-13	0.300501	51.4341
rs111398862	C	T	0.0155215	0.00279969	2.99999e-08	0.171828	30.736
rs144266718	T	C	-0.0141817	0.00218383	8.4004e-11	0.349475	42.1715
rs2721942	C	T	-0.0185263	0.00231348	1.20005e-15	0.280253	64.1277
rs2737229	A	C	-0.0144867	0.00217623	2.80027e-11	0.352833	44.3128
rs117630714	C	A	0.0161605	0.00243383	3.10027e-11	0.76068	44.0889
rs182606931	C	T	0.0147514	0.00245659	1.89998e-09	0.767003	36.058
rs7822300	T	C	-0.0123087	0.00225101	4.49997e-08	0.351216	29.8999
rs186504066	G	A	0.0120437	0.00210707	1.09999e-08	0.428063	32.671
rs74391674	C	T	0.0134631	0.0021028	1.5e-10	0.423856	40.9915
rs140617758	C	T	0.0150192	0.00211888	1.39991e-12	0.403857	50.2436
rs117961539	G	A	0.0157424	0.00212274	1.20005e-13	0.397895	54.9982
rs113513807	G	A	0.015036	0.00211739	1.20005e-12	0.404356	50.427
rs78461695	G	A	0.0152059	0.0021176	6.89922e-13	0.40399	51.5628
rs35134741	G	A	0.0150378	0.00211739	1.20005e-12	0.404618	50.439
rs34132016	C	T	0.0152183	0.00211861	6.79986e-13	0.404283	51.5977
rs199720608	T	C	0.0158525	0.00213422	1.10002e-13	0.397899	55.1718
rs74772299	G	A	0.015795	0.0021294	1.20005e-13	0.39856	55.0205
rs141717948	G	T	0.0180257	0.00215786	6.59933e-17	0.374332	69.7811
rs138660645	G	A	0.0114997	0.00210966	5e-08	0.569405	29.7131
rs11786896	C	T	0.013964	0.00209772	2.80027e-11	0.430237	44.3123
rs28409207	G	A	-0.0172032	0.00215663	1.50003e-15	0.630869	63.6308
rs78731895	A	G	0.0137915	0.00210725	6.00067e-11	0.415347	42.8342
rs77445084	T	C	0.0166836	0.00218652	2.29985e-14	0.347587	58.2201
rs10738463	G	A	-0.0137006	0.00247956	3.29997e-08	0.739118	30.5302
rs2073925	G	A	0.0127462	0.00225833	1.7e-08	0.3071	31.8557
rs75738635	A	G	0.0195214	0.00312642	4.30002e-10	0.871045	38.9877
rs117397870	T	C	-0.0247787	0.00371518	2.60016e-11	0.085547	44.4833
rs145526382	C	T	-0.0247724	0.00371407	2.60016e-11	0.085541	44.4873
rs8176733	T	C	0.0410869	0.00267778	3.90032e-53	0.184543	235.427
rs62574659	C	A	0.0263177	0.00358287	2.09991e-13	0.093217	53.9553
rs137855938	A	G	-0.024926	0.00304277	2.60016e-16	0.864963	67.1069
rs77868870	G	A	-0.0178565	0.00287066	5e-10	0.157448	38.6927
rs1757211	G	A	0.0171563	0.00286751	2.19999e-09	0.843312	35.7962
rs77726527	C	T	0.0146938	0.00262489	2.19999e-08	0.801134	31.3362
rs116771224	T	C	0.0135119	0.0023078	4.79999e-09	0.287131	34.2797
rs976785	C	T	0.0136922	0.00232247	3.69999e-09	0.280212	34.7573
rs17104025	T	C	0.0181216	0.0030135	1.79999e-09	0.140491	36.1619
rs36212413	A	G	0.0116965	0.00209486	2.39999e-08	0.55238	31.1747
rs141209390	C	T	0.0116749	0.00209468	2.5e-08	0.548559	31.065
rs528775222	A	C	0.0115334	0.00208805	3.29997e-08	0.533974	30.5093
rs36212726	T	C	0.011451	0.0020885	4.20001e-08	0.534105	30.062
rs2950360	C	T	0.023577	0.0036017	5.90065e-11	0.093517	42.8511
rs76921386	C	T	0.0237216	0.00358572	3.69999e-11	0.094384	43.7658
rs11248329	A	C	-0.0241711	0.00351131	5.79963e-12	0.902704	47.3865
rs11595648	G	A	0.0136483	0.00210499	8.9002e-11	0.576185	42.0395
rs2293436	C	G	0.0246148	0.0034283	7.00003e-13	0.103977	51.5507
rs7927408	T	C	-0.0118734	0.00214585	3.09999e-08	0.619967	30.6162
rs80176297	G	A	0.0165495	0.00300392	3.59998e-08	0.139543	30.3524
rs11031566	T	G	0.0165707	0.00302578	4.30002e-08	0.137482	29.9921
rs118168570	G	A	0.0324429	0.00539171	1.79999e-09	0.038549	36.2065
rs118013839	G	A	0.0618806	0.00449333	3.80014e-43	0.057241	189.659
rs71480317	T	C	0.0138402	0.00229167	1.5e-09	0.291064	36.4738
rs12574790	C	T	0.0687077	0.00400913	7.8001e-66	0.072614	293.704
rs75310100	G	T	-0.0642397	0.00413203	1.69981e-54	0.932094	241.702
rs180366	C	T	0.0726108	0.00298805	1.90108e-130	0.141156	590.509
rs143947205	T	C	0.0754792	0.00417869	6.20012e-73	0.066075	326.268
rs4938308	C	T	-0.0692137	0.00414158	1.10002e-62	0.932306	279.288
rs143811287	C	T	0.0760516	0.00425461	1.80011e-71	0.063539	319.519
rs77082266	C	A	-0.027715	0.00318102	2.99985e-18	0.876005	75.9096
rs34552724	T	C	-0.0225606	0.00342525	4.49987e-11	0.103206	43.3827
rs149137426	T	A	-0.0301091	0.00229921	3.50026e-39	0.707608	171.49
rs139447106	C	T	0.0290585	0.00351406	1.29987e-16	0.097734	68.3798
rs78013608	G	A	0.0322777	0.00338111	1.29987e-21	0.106719	91.1353
rs73023063	A	G	0.0326028	0.00346081	4.49987e-21	0.100489	88.7471
rs117050823	A	G	-0.0272249	0.00338933	9.49948e-16	0.894108	64.5216
rs144578147	G	C	-0.0259968	0.00451918	8.79995e-09	0.056139	33.0918
rs117046382	C	T	-0.0165143	0.00218884	4.49987e-14	0.65678	56.9236
rs73006585	G	C	-0.0272573	0.00339154	9.20026e-16	0.894605	64.591
rs526602	G	A	0.0205164	0.00289119	1.29987e-12	0.152249	50.3557
rs78599054	G	A	0.0137102	0.0022442	1e-09	0.310338	37.322
rs143392003	C	T	0.0254683	0.00326837	6.59933e-15	0.114211	60.7208
rs149051048	C	T	0.058781	0.00430221	1.69981e-42	0.062044	186.677
rs1613842	C	T	0.0590325	0.00398765	1.39991e-49	0.073296	219.153
rs142577432	T	C	0.0420573	0.00306329	6.79986e-43	0.133654	188.498
rs117827160	C	T	0.0412118	0.00305294	1.59993e-41	0.133864	182.224
rs17135401	C	G	-0.0190816	0.00241056	2.49977e-15	0.683434	62.6605
rs111299622	T	C	-0.0137073	0.00244047	1.89998e-08	0.246015	31.5469
rs140255867	A	G	-0.0174196	0.00243021	7.59976e-13	0.239321	51.3794
rs10876973	C	T	-0.0179691	0.00243318	1.50003e-13	0.238609	54.5386
rs144609873	G	A	-0.0174946	0.00245604	1.10002e-12	0.233686	50.7384
rs113229733	G	A	-0.0175547	0.00242635	4.70002e-13	0.240752	52.3456
rs35518087	G	C	0.0139218	0.00210636	3.90032e-11	0.498172	43.6843
rs117678558	A	G	0.0142253	0.00208379	8.69961e-12	0.503821	46.6031
rs12814173	C	T	0.0139745	0.00208516	2.09991e-11	0.516958	44.9152
rs78540170	C	G	0.0136438	0.00209043	6.70039e-11	0.549438	42.599
rs148661844	G	A	0.0147529	0.00247617	2.59998e-09	0.228462	35.4972
rs73412340	G	C	-0.0214694	0.00210883	2.39994e-24	0.479487	103.647
rs148105067	A	C	0.0208482	0.00257613	5.79963e-16	0.204191	65.494
rs4041274	T	C	0.0208793	0.00258159	6.09958e-16	0.2032	65.412
rs616559	T	C	-0.0208868	0.0020974	2.29985e-23	0.438645	99.1702
rs117700897	G	A	0.0197692	0.00275821	7.59976e-13	0.171441	51.3717
rs78092315	C	T	-0.0195171	0.00276511	1.69981e-12	0.828843	49.8202
rs61941270	G	C	0.0223238	0.00299853	9.70063e-14	0.153875	55.4268
rs146356085	A	G	-0.0194405	0.00273624	1.20005e-12	0.82557	50.4785
rs189424182	G	T	0.0195661	0.00275497	1.20005e-12	0.171289	50.44
rs143649540	G	A	0.0193301	0.002745	1.9002e-12	0.172876	49.5888
rs140040372	C	T	0.0191174	0.00274619	3.40017e-12	0.172723	48.4615
rs117420518	G	A	-0.0190432	0.00274576	4.00037e-12	0.82719	48.1011
rs139337031	T	C	0.0190236	0.00274574	4.30031e-12	0.172899	48.0028
rs147970597	A	G	0.0223648	0.00403832	3.09999e-08	0.07553	30.671
rs142736021	C	T	-0.0195874	0.00211504	1.99986e-20	0.40891	85.7662
rs117095172	C	G	0.0207833	0.00380904	4.90004e-08	0.081076	29.7713
rs11066313	T	C	0.0199149	0.0035298	1.7e-08	0.095937	31.8314
rs78777545	G	A	0.0150863	0.00226892	2.90001e-11	0.692749	44.2107
rs73169145	G	T	-0.0149623	0.00256302	5.30005e-09	0.209997	34.0795
rs185182187	A	G	-0.0139212	0.00210073	3.40017e-11	0.56266	43.915
rs559067	C	T	-0.0225808	0.00208226	2.09991e-27	0.523121	117.6
rs11571713	C	T	-0.0233781	0.00220143	2.39994e-26	0.451047	112.774
rs9534259	T	C	-0.0234269	0.00220165	1.9002e-26	0.451044	113.223
rs11571760	G	A	-0.019414	0.00268467	4.79954e-13	0.183323	52.2936
rs17077569	G	T	0.0161104	0.00238843	1.50003e-11	0.747039	45.4975
rs143696501	T	C	0.016156	0.00238921	1.39991e-11	0.747091	45.7256
rs149968987	T	C	0.0160792	0.00238867	1.69981e-11	0.747042	45.3123
rs117232604	C	T	0.0163099	0.00240455	1.20005e-11	0.751715	46.0082
rs71436482	T	C	-0.0196374	0.00290353	1.29987e-11	0.157823	45.742
rs184451141	T	A	-0.015739	0.00240063	5.50047e-11	0.250007	42.9837
rs112410737	A	G	0.0148115	0.00252775	4.60002e-09	0.784032	34.3344
rs117741779	C	T	0.0166496	0.00251528	3.59998e-11	0.779159	43.8162
rs56184409	A	G	0.0189092	0.00208612	1.29987e-19	0.467346	82.1614
rs137926071	A	G	-0.0168988	0.0021258	1.9002e-15	0.561516	63.1927
rs148224210	G	A	0.0160847	0.00209179	1.50003e-14	0.530503	59.1275
rs78022520	A	G	0.0197839	0.00214973	3.50026e-20	0.374524	84.6947
rs147896128	C	A	0.0218828	0.00296835	1.69981e-13	0.856017	54.347
rs77015786	C	T	0.018817	0.00208371	1.69981e-19	0.467511	81.5504
rs75916072	A	G	0.01936	0.00214683	1.9002e-19	0.376148	81.3234
rs118187136	A	G	0.0218516	0.00295995	1.59993e-13	0.855714	54.5002
rs77439047	C	A	0.0186432	0.00232819	1.20005e-15	0.723758	64.1216
rs8003323	C	G	0.0218969	0.00300511	3.19963e-13	0.86071	53.0939
rs61979072	C	A	-0.0190141	0.00210592	1.69981e-19	0.556604	81.5207
rs112978910	A	T	-0.0130767	0.0021289	8.10009e-10	0.40483	37.7299
rs11848791	T	G	-0.0181778	0.0020991	4.70002e-18	0.559631	74.9923
rs2806042	A	G	-0.0219905	0.00372421	3.50002e-09	0.085382	34.866
rs4984246	G	T	0.0133059	0.00219216	1.29999e-09	0.34317	36.8421
rs80029078	C	A	-0.0209206	0.00357714	5e-09	0.900585	34.204
rs12438654	C	G	-0.0815209	0.0145079	1.89998e-08	0.005159	31.5739
rs72783184	C	T	0.0236441	0.00419293	1.7e-08	0.065697	31.7988
rs7202340	C	A	-0.0180355	0.00288135	3.89996e-10	0.154215	39.18
rs188134437	G	A	0.0247859	0.00328385	4.40048e-14	0.114054	56.9695
rs184489351	T	G	0.0189199	0.00238626	2.19989e-15	0.745249	62.864
rs74436361	C	G	0.0293754	0.00239189	1.10002e-34	0.251579	150.829
rs140052183	G	C	-0.0329548	0.00312453	5.19996e-26	0.127162	111.242
rs56402855	A	C	0.0296045	0.00239725	4.90004e-35	0.251685	152.507
rs2288000	A	G	0.0494204	0.00267088	1.9002e-76	0.187904	342.376
rs142985659	T	C	-0.014298	0.00259142	3.40001e-08	0.201685	30.4421
rs28655387	T	G	0.0510474	0.00798422	1.6e-10	0.980823	40.8773
rs16970746	T	G	0.0342484	0.00374367	5.79963e-20	0.085568	83.6923
rs140593645	C	T	-0.237589	0.0133531	8.00018e-71	0.007034	316.584
rs140812126	G	C	-0.244664	0.0132865	1e-75	0.007122	339.093
rs72837635	T	G	-0.245208	0.013258	2.29985e-76	0.007108	342.069
rs2053595	G	A	-0.301025	0.014099	3.80189e-101	0.006541	455.857
rs569750461	A	G	-0.022616	0.00235264	7.00003e-22	0.363813	92.4104
rs117135784	G	A	-0.0182432	0.00221372	1.69981e-16	0.356689	67.9136
rs314252	G	A	0.0120069	0.00213635	1.89998e-08	0.399637	31.5876
rs385313	C	G	-0.0128466	0.00210041	9.59997e-10	0.545741	37.4083
rs193281032	T	A	-0.0134225	0.00220427	1.09999e-09	0.50149	37.0798
rs11658781	C	T	-0.0267914	0.00455476	4.09996e-09	0.063452	34.5987
rs185344721	C	T	0.0486818	0.00826593	3.89996e-09	0.01619	34.6856
rs118085031	C	T	0.0718799	0.0115359	4.60002e-10	0.009654	38.825
rs80022146	C	T	0.0760345	0.0111322	8.49963e-12	0.010114	46.6508
rs62065715	T	C	0.0737807	0.0109056	1.29987e-11	0.010339	45.7706
rs17690038	A	G	0.0649982	0.00607493	1e-26	0.030371	114.477
rs12942587	T	C	0.0696677	0.00980521	1.20005e-12	0.012186	50.4835
rs61733038	G	A	0.013495	0.00228983	3.79997e-09	0.292407	34.7328
rs145099373	T	C	-0.0480639	0.00318777	2.29985e-51	0.11727	227.334
rs2164113	C	T	-0.0391547	0.00255767	6.70039e-53	0.201744	234.357
rs2722658	C	T	-0.0702367	0.00331253	8.9002e-100	0.108388	449.582
rs3763954	G	A	-0.0564865	0.00294856	8.4004e-82	0.141936	367.003
rs139713518	C	T	-0.0146066	0.00207196	1.80011e-12	0.561872	49.6976
rs114152564	C	T	-0.0339848	0.00247526	6.70039e-43	0.220875	188.507
rs55950804	C	T	0.0337805	0.00251183	3.10027e-41	0.783774	180.864
rs2571041	G	A	0.103309	0.00412716	2.79898e-138	0.927141	626.576
rs187888371	G	A	-0.0136276	0.00241242	1.6e-08	0.751359	31.9104
rs189824995	G	A	0.0137782	0.00239397	8.60003e-09	0.251224	33.1244
rs75667187	G	A	-0.0138392	0.00242897	1.2e-08	0.753759	32.4622
rs4809322	C	T	0.0143328	0.00241541	2.99999e-09	0.244696	35.2112
rs75031349	A	G	0.0150413	0.00251557	2.19999e-09	0.230453	35.7518
rs112662625	A	G	0.0150868	0.002476	1.09999e-09	0.235999	37.1273
rs35640778	G	A	0.0143481	0.00241515	2.80001e-09	0.244769	35.294
rs80132799	C	T	0.0144972	0.00241551	2e-09	0.244866	36.0206
rs143585597	C	T	-0.0144015	0.00241648	2.5e-09	0.755392	35.518
rs115610405	C	A	0.0143951	0.0024213	2.80001e-09	0.243581	35.3453
rs79496165	A	G	0.0156703	0.00218819	8.00018e-13	0.344136	51.2843
rs74664523	G	A	0.0157315	0.00218663	6.29941e-13	0.344372	51.7595
rs11091006	G	A	0.0149928	0.00221195	1.20005e-11	0.329123	45.9425
rs147261066	C	T	0.0165662	0.00242035	7.70016e-12	0.288721	46.8478
rs145946056	A	G	0.016073	0.002659	1.5e-09	0.191369	36.539

## Sheet: Supplementary Table 10
Supplementary Table 10. Genetic variants that were used as instruments for Lipoprotein A in Finn
SNP	Effect Allele	other allele	Beta	SE	P value	Effect Allele Frequency	F
rs11781491	G	A	-1.854	0.20084	2.6996e-20	0.12662	85.2156
rs16921167	C	A	29.252	0.81834	1e-200	0.0070711	1277.74
rs6994760	A	G	-1.9103	0.19828	5.76368e-22	0.13643	92.8208
rs117243477	A	C	67.465	2.2114	1e-200	0.0010498	930.727
rs951256	G	A	67.056	2.2083	1e-200	0.0010597	922.06
rs13276393	C	A	55.734	1.4442	1e-200	0.0025785	1489.31
rs60165767	T	C	-11.652	0.15452	1e-200	0.75669	5686.32
rs2083534	T	C	-3.1886	0.13959	2.22331e-115	0.35995	521.785
rs4738567	A	C	32.328	1.6937	3.65174e-81	0.0018253	364.321
rs72654832	A	C	-0.80437	0.13856	6.43724e-09	0.37933	33.7005

[truncated: 22 more sheets: Supplementary Table 11, Supplementary Table 12, Supplementary Table 13, Supplementary Table 14, Supplementary Table 15, Supplementary Table 16, Supplementary Table 17, Supplementary Table 18, Supplementary Table 19, Supplementary Table 20, Supplementary Table 21, Supplementary Table 22, Supplementary Table 23, Supplementary Table 24, Supplementary Table 25,  Supplemental Table 26,  Supplemental Table 27,  Supplemental Table 28,  Supplemental Table 29,  Supplemental Table 30 …]
